# Supplementary material for: Physical activity, sedentary behaviour, and childhood asthma: a European collaborative analysis
Source: PubMed Central journal article supplement — BMJ Open Respir Res. 2024 Aug 14;11(1):e001630. doi: 10.1136/bmjresp-2023-001630 (PMC11331876; doi:10.1136/bmjresp-2023-001630), 2024-08-14
Supplement: bmjresp-11-1-s001.pdf [file bmjresp-11-1-s001.pdf]

## Appendix

Table A. Overview of cohort-specific questionnaires and accelerometry on physical activity and sedentary behaviour

Table B. Overview of cohort-specific questionnaires on asthma, wheeze, and medication use

Table C. Covariables of participating cohorts

Table D. Longitudinal analyses on physical activity, sedentary behaviour and current asthma between age 6 and 18 years – exclusion of wheeze and asthma at baseline

Table E. Longitudinal analyses on physical activity, sedentary behaviour and ISAAC based definition of current asthma between age 6 and 18 years

Table F. Longitudinal analyses on physical activity, sedentary behaviour and MeDALL based definition of current asthma between age 6 and 18 years

Table G. Longitudinal analyses on physical activity and sedentary behaviour in tertiles and current asthma at age 6-18 years (multivariable)

Table H. Longitudinal analyses on physical activity and sedentary behaviour in tertiles and current asthma at age 6-18 years (univariable)

Figure A. Meta-analysis of longitudinal data on sedentary behaviour measured with accelerometry and current asthma at age 6-18 years

Table I. Longitudinal age-specific analyses on physical activity in hours/day and sedentary behaviour in hours/day and current asthma (multivariable)

Table J. Longitudinal age-specific analyses on physical activity in hours/day and sedentary behaviour in hours/day and current asthma (univariable)

Table K. Longitudinal age-specific analyses on physical activity in tertiles and current asthma (multivariable)

Table L. Longitudinal age-specific analyses on physical activity in tertiles and current asthma (univariable)

Table M. Longitudinal analyses on physical activity in hours/day and sedentary behaviour in hours/day and current asthma between age 6 and 18 years – interaction with BMI at baseline and physical activity and sedentary behaviour (multivariable)

Table N. Longitudinal analyses on physical activity in hours/day and sedentary behaviour in hours/day and current asthma between age 6 and 18 years – interaction with BMI at baseline and physical activity and sedentary behaviour (univariable)

Table O. Longitudinal age-specific analyses on physical activity in hours/day and sedentary behaviour in hours/day and lung function

Table P. Longitudinal age-specific analyses on physical activity in hours/day and sedentary behaviour in hours/day and lung function – exclusion of wheeze and asthma at baseline

Table Q. Longitudinal age-specific analyses on physical activity measured with accelerometry and lung function

Table R. Longitudinal age-specific analyses on physical activity measured with accelerometry and lung function – exclusion of wheeze and asthma at baseline

**Table A. Overview of cohort-specific questionnaires and accelerometry on physical activity and sedentary behaviour**

| Cohort                 | Physical Activity / sedentary behaviour                                                                                                                                                                                                                                                                                                                                                                                                                                                                                                                                                                                                                                                                                                                                                                                                                                                                                                                                                                                                                     |
|------------------------|-------------------------------------------------------------------------------------------------------------------------------------------------------------------------------------------------------------------------------------------------------------------------------------------------------------------------------------------------------------------------------------------------------------------------------------------------------------------------------------------------------------------------------------------------------------------------------------------------------------------------------------------------------------------------------------------------------------------------------------------------------------------------------------------------------------------------------------------------------------------------------------------------------------------------------------------------------------------------------------------------------------------------------------------------------------|
| ABCD                   | <p><b>Questionnaire on physical activity. Questions on 5-6 and 7-8 years old:</b></p> <ul style="list-style-type: none"> <li>- 'How many hours a day does your child play outside in the summer?' (same question for the winter)</li> <li>- 'How many times a week does your child walk to or from school?' (same question for cycling)</li> <li>- 'How many hours a week does your child play sport at sport club(s)'</li> </ul> <p><b>Questionnaire on sedentary behaviour. Questions on 5-6 and 7-8 years old:</b></p> <ul style="list-style-type: none"> <li>- 'How many hours a day does your child watch television, a DVD or a video at home or at a friend's house?'</li> <li>- How many hours a day does your child sit at home or at a friend's house playing on the computer, Playstation or X-box?</li> </ul>                                                                                                                                                                                                                                   |
| ABIS                   | <p>hours per day in exercise playing outside jumping running</p> <p>hours per day TV, watching computer internet</p>                                                                                                                                                                                                                                                                                                                                                                                                                                                                                                                                                                                                                                                                                                                                                                                                                                                                                                                                        |
| BAMSE                  | <p><b>Parental questionnaire at age 8 years:</b><br/>Does your child participate in any type of organized physical activity or sport (excl school phys.)?</p> <p><b>Parental web-questionnaire at age 12 years:</b><br/>Does your child engage in sports or physical activity in his/her leisure time?<br/>How long does your child exercise on each occasion, on the average?</p> <p><b>Participant web-questionnaire at age 16 years:</b><br/>Over the past 12 months, how many hours during an ordinary week have you engaged in very strenuous activities?<br/>Over the past 12 months, how many hours during an ordinary week have you engaged in fairly strenuous activities?<br/>Over the past 12 months, how many hours during an ordinary week have you engaged in activities that are not strenuous?<br/>At school, how many class hours of physical education do you participate in per week?<br/>How many hours per day do you watch TV, use a computer, play computer- or video games or read?</p>                                             |
| CHOP                   | <p><b>Questionnaire at age 3-6 years</b><br/>Hours/day</p> <p><b>Questionnaire at age 8, 11 years</b><br/>PAQ-score</p> <p><b>Accelerometry at age 6, 11 years</b><br/>Sensewear Pro Armband, epoch length 60 seconds, total energy expenditure, sleeping time, time in different activity levels.<br/>Count cut-offs based on METs:<br/>0-3 sedentary<br/>3-6 moderate<br/>6-9 vigorous<br/>Above 9 very vigorous</p>                                                                                                                                                                                                                                                                                                                                                                                                                                                                                                                                                                                                                                      |
| COPSAC <sub>2000</sub> | <p><b>Accelerometry at age 5 years</b><br/>Omnidirectional Actical accelerometer (Philips Respironics, Murrysville, PA)</p>                                                                                                                                                                                                                                                                                                                                                                                                                                                                                                                                                                                                                                                                                                                                                                                                                                                                                                                                 |
| DNBC                   | <p><b>Computer-assisted telephone interview with the mother (child age 1.5 years):</b><br/>D149: Do you think he/she is MORE or LESS active than kids the same age?</p> <p><b>Web-based or paper-mailed questionnaire to mother/parent (child age 7 years):</b><br/>Z014: "How many hours is your daughter physically active in kindergarten, school or at the leisure centre/school leisure centre, e.g. running, hopping, climbing, cycling, training sport or other activities, which require a lot of movement (Tick one box only)?"<br/>Z015: "How many hours is your daughter physically active with e.g. running, hopping, climbing, cycling, training sport or other activities, which require a lot of movement? Please assess how physically active she is on a normal weekday after kindergarten, school or the leisure centre/ school leisure centre compared to a normal day during the weekend. (Tick one box in each column)"<br/>Additional relevant questions:<br/>Z070: Is she/he "Restless, overactive, cannot stay still for long",</p> |

|          |                                                                                                                                                                                                                                                                                                                                                                                                                                                                                                                                                                                                                                                                                                                                                                                                                                                                                                                                                                                                                                                                                                                                                                                                                                                                                                                                                                                                                                                                                                                                                                                                                                                                                                                                                                                                                                                                                                                                                                                                                                                                                                                                                                                                                                                                                                                                                                                                                                                                                                                                 |
|----------|---------------------------------------------------------------------------------------------------------------------------------------------------------------------------------------------------------------------------------------------------------------------------------------------------------------------------------------------------------------------------------------------------------------------------------------------------------------------------------------------------------------------------------------------------------------------------------------------------------------------------------------------------------------------------------------------------------------------------------------------------------------------------------------------------------------------------------------------------------------------------------------------------------------------------------------------------------------------------------------------------------------------------------------------------------------------------------------------------------------------------------------------------------------------------------------------------------------------------------------------------------------------------------------------------------------------------------------------------------------------------------------------------------------------------------------------------------------------------------------------------------------------------------------------------------------------------------------------------------------------------------------------------------------------------------------------------------------------------------------------------------------------------------------------------------------------------------------------------------------------------------------------------------------------------------------------------------------------------------------------------------------------------------------------------------------------------------------------------------------------------------------------------------------------------------------------------------------------------------------------------------------------------------------------------------------------------------------------------------------------------------------------------------------------------------------------------------------------------------------------------------------------------------|
|          | <p>Z076: where you (the mother) “restless, “hyperactive”, had problems keeping quiet long” in childhood?</p> <p><b>Web-based questionnaire to child when aged 11 years:</b></p> <p>E057: How many sports lessons per week (lessons of 45 minutes) does your school timetable include?</p> <p>E058: Do you get out of breath or break sweat during the sports lessons?</p> <p>E059: How do you usually use your body during the breaks? Think about the last month when choosing your answer.</p> <p>E060 How do you usually use your body during your leisure time? Think about the last month when choosing your answer.</p> <p>E061: Do you do sports in your leisure time?</p> <p>E062_1-12: What kind of sports do you do? Tick all the activities you participate in.</p> <p>E062_1A - 12A: How many times per week do you play ..... [asked for each kind of sport mentioned in E062_1-12]</p> <p>E063-E066 may be considered questions on activity or inactivity. They are described in under physical inactivity.</p> <p>Additional relevant questions to adult: Is she/he “Restless, overactive, cannot stay still for long”</p> <p><b>Web-based or paper-mailed questionnaire to mother/parents (child age 7 years):</b></p> <p>Z016: How many hours is your daughter physically inactive on a normal weekday/day during the weekend, i.e. rests, sleeps during the day, reads, watches TV, plays computer games, is tutored, etc. after school or school leisure centre/leisure centre? (Tick one box in each column).</p> <p><b>Web-based questionnaire to child when aged 11 years:</b></p> <p>E049/E050: How much of your leisure time do you spend in front of the computer? Count all the time you sit in front of a computer. (Weekday computer).</p> <p>E051/E052: How much of your leisure time do you spend playing computer games? (Both on a computer or on a Playstation, Xbox, PSP, Nintendo, Wii). (Weekday gaming).</p> <p>E053/E054: How much of your leisure time do you spend watching tv? (include DVD/video or watching films on your computer). (Weekdays TV/DVD/Video).</p> <p>E055/E056: How much of your leisure time do you spend reading, playing boardgames, drawing, resting, etc.? (including homework). (Weekdays read, play, rest).</p> <p>E063: How do you usually get to school?</p> <p>E064: How long does it usually take you to get to school?</p> <p>E065: How do you usually get back from school?</p> <p>E066: How long does it usually take you to get back from school?</p> |
| EDEN     | Questionnaire at age 0-2 and 3-5 years on physical activities and sedentary behaviour in hours per week.                                                                                                                                                                                                                                                                                                                                                                                                                                                                                                                                                                                                                                                                                                                                                                                                                                                                                                                                                                                                                                                                                                                                                                                                                                                                                                                                                                                                                                                                                                                                                                                                                                                                                                                                                                                                                                                                                                                                                                                                                                                                                                                                                                                                                                                                                                                                                                                                                        |
| G21      | <p><b>Questionnaire on physical activity</b> ( How many hours per day does your child play outside during week days? And, how many hours per day does your child play outside during the weekend?)</p> <p><b>Questionnaire on physical inactivity</b> ( How many hours per day does your child watch television, plays videogames, during week days? And ( How many hours per day does your child watch television, plays videogames, during the weekend?)</p>                                                                                                                                                                                                                                                                                                                                                                                                                                                                                                                                                                                                                                                                                                                                                                                                                                                                                                                                                                                                                                                                                                                                                                                                                                                                                                                                                                                                                                                                                                                                                                                                                                                                                                                                                                                                                                                                                                                                                                                                                                                                  |
| Gen R    | <p>Playing outside (no of times (<b>4, 6, 9y</b>) and duration (<b>3, 4, 6, 9y</b>))</p> <p>Walking or cycling from/to school (no of times and duration (<b>6, 9y</b>))</p> <p>Participation in sports (duration (<b>9y</b>))</p> <p>Physical education lesson (no of times and duration (<b>6y</b>))</p> <p>Swimming lesson (no of times and duration (<b>6y</b>))</p> <p>Watching TV/video/DVD (no of times (<b>4, 6, 9y</b>) and duration (<b>2, 3, 4, 6, 9y</b>))</p> <p>Computer use (no of times (<b>6, 9y</b>) and duration (<b>3, 6, 9y</b>))</p> <p><b>NB:</b> at 2, 3, 6 and 9y separate for weekday and weekend</p>                                                                                                                                                                                                                                                                                                                                                                                                                                                                                                                                                                                                                                                                                                                                                                                                                                                                                                                                                                                                                                                                                                                                                                                                                                                                                                                                                                                                                                                                                                                                                                                                                                                                                                                                                                                                                                                                                                  |
| GINIplus | <p><b>Questionnaire on physical activity at age 6:</b> “How many hours per day does your child spend outside during summer/during winter?”;</p> <p><b>Questionnaire on physical activity at age 10 and 15:</b> How many hours per week during summer/during winter does the child spend in</p> <p>light activity (no sweating, normal respiration, e.g. walking)</p> <p>moderate activity (some sweating, moderately increased respiration, e.g. cycling, swimming, skating)</p> <p>vigorous activity (strong sweating, fast respiration, e.g. ball games, training)</p> <p><b>Questionnaire on sedentary behaviour at age 6, 10 and 15:</b> “How many hours per day does your child spend in front of a screen (TV, PC)?” (for 10 and 15 years, it was differentiated between summer and winter)</p>                                                                                                                                                                                                                                                                                                                                                                                                                                                                                                                                                                                                                                                                                                                                                                                                                                                                                                                                                                                                                                                                                                                                                                                                                                                                                                                                                                                                                                                                                                                                                                                                                                                                                                                           |
| HUMIS    | <b>3 year questionnaire:</b>                                                                                                                                                                                                                                                                                                                                                                                                                                                                                                                                                                                                                                                                                                                                                                                                                                                                                                                                                                                                                                                                                                                                                                                                                                                                                                                                                                                                                                                                                                                                                                                                                                                                                                                                                                                                                                                                                                                                                                                                                                                                                                                                                                                                                                                                                                                                                                                                                                                                                                    |

|          |                                                                                                                                                                                                                                                                                                                                                                                                                                                                                                                                                                                                                                                                                                                                                                                                                                                                                                                                                                                                                                                                                                                                                                                                                                                                                                                                                                                                                                                                                                                                                                                                                                                                                                                                                                                                                                                                                     |
|----------|-------------------------------------------------------------------------------------------------------------------------------------------------------------------------------------------------------------------------------------------------------------------------------------------------------------------------------------------------------------------------------------------------------------------------------------------------------------------------------------------------------------------------------------------------------------------------------------------------------------------------------------------------------------------------------------------------------------------------------------------------------------------------------------------------------------------------------------------------------------------------------------------------------------------------------------------------------------------------------------------------------------------------------------------------------------------------------------------------------------------------------------------------------------------------------------------------------------------------------------------------------------------------------------------------------------------------------------------------------------------------------------------------------------------------------------------------------------------------------------------------------------------------------------------------------------------------------------------------------------------------------------------------------------------------------------------------------------------------------------------------------------------------------------------------------------------------------------------------------------------------------------|
|          | <p>“How often is your child outside at present? Seldom; Frequently, but less than 1 hour a day on average; 1-3 hours a day on average; more than 3 hours a day”</p> <p>“How many hours on average does your child sit in front of a TV/video every day? 4 hours or more; 3 hours; 1-2 hours; less than 1 hour; seldom/never”</p> <p>7 year questionnaire:</p> <p>“Outside of school, on a regular week day: How many hours per day does the child usually spend watching TV, videos, playing electronic video games, DVDs or using a computer?<br/> Summer... Winter...                      Less than 1 hr per day;                      1-2 hrs/day<br/> 3-5 hrs/day                                      &gt;5 hrs or more/day”</p> <p><b>7 year questionnaire:</b></p> <p>“Outside of school: Approximately how many times per week is the child physically active/ takes part in sports such that he/she become short of breath or sweaty? X times per week”</p> <p>“Outside of school: Approximately how many hours per week does the child spend on physical activity/sports (soccer, handball, skiing or gymnastics/dance or similar)? &lt;1 hr/wk; 1-2 hr/wk; 3-4 hr/wk; 5-7 hr/wk; 8-10 hr/wk; 11 hr/wk”</p> <p>“Outside of school on a regular week day: Approximately how many hours per day is the child usually outdoors? Summer / Winter X hrs/day”</p> <p>“How often does the child get to school by? Walking/riding a bike... Car... Public transportation: never; sometimes; usually; always”</p> <p>“How far is the child’s home from school? Less than 1 km; 1-2 km; 3-4 km; &gt;4 km”</p>                                                                                                                                                                                                                                                                      |
| INMA     | <p><b>Global physical activity</b> (questionnaire on physical activity):</p> <p>“Overall, considering all physical activity of your child: Do you think your child is?”</p> <p><b>Physical activity at school</b> (questionnaire on physical activity):</p> <p>“How long usually do physical activities in the school? Include pool and playing in the yard. Specify activities”</p> <p><b>Energy expenditure in physical activity at school</b> (Calculations based on activities specified in the previous question ) **</p> <p><b>Walk to school</b> (questionnaire on physical activity):</p> <p>“How usually your child goes or comes back to school?<br/> 1 walking min/day: going____ return____”</p> <p><b>Energy expenditure walk to school</b> (Calculations based on **)</p> <p><b>Extracurricular physical activity</b>(questionnaire on physical activity): (see annex 1)</p> <p>“During a typical week, how long your child usually does extracurricular physical activity each day, (for example. dance lessons / swimming) or just play, running, biking, skating, swimming, etc. (exclude play Wii games and the trip to school). Specify activities.”</p> <p><b>Energy expenditure in extracurricular physical activity</b> (Calculations based on activities specified in the previous question ) **</p> <p><b>Physical inactivity</b> (Sum of inactivity questions):</p> <p>“How many hours a day usually sleeps your child? Including naps”</p> <p>“How many hours your child spend watching tv or videos a day?”</p> <p>“Outside school hours, how much time your child spends in sedentary games or activities (eg puzzles, reading, dolls / games, homework, etc.) a day? (Exclude television, videos and Wii-sports)”</p> <p><b>Energy expenditure in physical inactivity</b> (Calculations based on activities specified in the previous question )**</p> |
| KOALA    | <p><b>Questionnaire at age 1-2 years:</b></p> <p>How often does your child play outside?<br/> How often does your child watch TV?<br/> How often does your child play on the computer?</p> <p><b>Questionnaire at age 4-5 years and 6-7 years:</b></p> <p>How often does your child walk or cycle to school?<br/> How often does your child sport on school?<br/> How often does your child sport outside of school?<br/> How often does your child play outside?<br/> How often does your child watch TV?<br/> How often does your child play on the computer?<br/> How often does your child sit in the car?</p> <p><b>Accelerometry data at age 4-5 years and 6-7 years:</b></p> <p>Actigraph 7164 during day time for at least 5 days. Epoch length 15 seconds. Counts per minute. Four intensity levels: sedentary, light, moderate and vigorous PA based on cut-off values established by Evenson et al.</p>                                                                                                                                                                                                                                                                                                                                                                                                                                                                                                                                                                                                                                                                                                                                                                                                                                                                                                                                                                  |
| Lifeways | Hours activity/inactivity                                                                                                                                                                                                                                                                                                                                                                                                                                                                                                                                                                                                                                                                                                                                                                                                                                                                                                                                                                                                                                                                                                                                                                                                                                                                                                                                                                                                                                                                                                                                                                                                                                                                                                                                                                                                                                                           |

|       |                                                                                                                                                                                                                                                                                                                                                                                                                                                                                                                                                                                                                                                                                                                                                                                                                                                                                                                                                                                                                                                                                                                                                                                                                                                                                                                                                                                                                                                                                                                                                                                                                                                                                                                                                                                                                                                                                                                                                                                                                                                                                                                                                |
|-------|------------------------------------------------------------------------------------------------------------------------------------------------------------------------------------------------------------------------------------------------------------------------------------------------------------------------------------------------------------------------------------------------------------------------------------------------------------------------------------------------------------------------------------------------------------------------------------------------------------------------------------------------------------------------------------------------------------------------------------------------------------------------------------------------------------------------------------------------------------------------------------------------------------------------------------------------------------------------------------------------------------------------------------------------------------------------------------------------------------------------------------------------------------------------------------------------------------------------------------------------------------------------------------------------------------------------------------------------------------------------------------------------------------------------------------------------------------------------------------------------------------------------------------------------------------------------------------------------------------------------------------------------------------------------------------------------------------------------------------------------------------------------------------------------------------------------------------------------------------------------------------------------------------------------------------------------------------------------------------------------------------------------------------------------------------------------------------------------------------------------------------------------|
| LISA  | <p><b>Questionnaire on physical activity at age 4 and 6:</b> “How many hours per day does your child spend outside during summer/during winter?”;</p> <p><b>Questionnaire on physical activity at age 10 and 15:</b> How many hours per week during summer/during winter does the child spend in</p> <ul style="list-style-type: none"> <li>• light activity (no sweating, normal respiration, e.g. walking)</li> <li>• moderate activity (some sweating, moderately increased respiration, e.g. cycling, swimming, skating)</li> <li>• vigorous activity (strong sweating, fast respiration, e.g. ball games, training)</li> </ul> <p><b>Questionnaire on sedentary behaviour at age 4, 6, 10 and 15:</b> “How many hours per day does your child spend in front of a screen (TV, PC)?” (for 10 and 15 years, it was differentiated between summer and winter)</p>                                                                                                                                                                                                                                                                                                                                                                                                                                                                                                                                                                                                                                                                                                                                                                                                                                                                                                                                                                                                                                                                                                                                                                                                                                                                            |
| LRC   | <p><b>Age 4-8 (2001)</b><br/>At the weekend, how many hours per day does your child usually:<br/>Play outdoors?<br/>Watch TV or play video games?<br/>Which of the following descriptions fits your child best? (categories: Not very active, moderately active, or very active)</p> <p><b>Age 6-10 (2003)</b><br/>At the weekend, how many hours per day does your child usually:<br/>Play outdoors?<br/>Watch TV or play video games?<br/>On average, how many hours a week does your child spend on sports, games or vigorous physical activity?<br/>How does your child usually go to school? (categories: by walking, by car, by bus, by bicycle)<br/>Which of the following descriptions fits your child best? (categories: Not very active, moderately active, or very active)</p> <p><b>Age 9-13 (2006)</b><br/>On average, how many hours a week does your child spend on sports, games or vigorous physical activity?<br/>Which of the following descriptions fits your child best? (categories: Not very active, moderately active, or very active)</p> <p><b>Age 13-17 (2010)</b><br/>In the past month, did you participate in any physical activities or exercises such as running, football, fitness, gym, or other active sports? IF YES: What activity? How often<br/>In a typical week, do you do vigorous physical activities for at least 10 minutes at a time?<br/>IF YES: On how many days do you do vigorous physical activities in a typical week days per week?<br/>How much time in total do you usually spend on one of those days doing vigorous physical activities?<br/>In a typical week, do you do moderate physical activities for at least 10 minutes at a time?<br/>IF YES: On how many days do you do moderate physical activities in a typical week days per week?<br/>How much time in total do you usually spend on one of those days doing moderate physical activities?<br/>How many hours per day do you spend, on average, doing following activities, outside working or school time?<br/>Watching TV, computer games, video games<br/>Quiet activities: reading, studying, listening to music</p> |
| LucKi | <p>How often does your child walk or cycle to school?<br/>How often does your child sport on school?<br/>How often does your child sport outside of school?<br/>How often does your child play outside?<br/>How often does your child watch TV?<br/>How often does your child play on the computer?<br/>How often does your child sit in the car?</p>                                                                                                                                                                                                                                                                                                                                                                                                                                                                                                                                                                                                                                                                                                                                                                                                                                                                                                                                                                                                                                                                                                                                                                                                                                                                                                                                                                                                                                                                                                                                                                                                                                                                                                                                                                                          |
| PIAMA | <p><b>Age 5, 7, 8:</b></p> <ul style="list-style-type: none"> <li>- cycling/ walking to school (time per day)</li> <li>- frequency physical education (gym) at school</li> <li>- sport club membership (incl swimming lessons, ballet etc)</li> <li>- time spent (per day) in physically active play (e.g. ball games, playing tag, skipping rope)</li> <li>- playing outside (times p. week)</li> <li>- watching TV/ video's / computer (hrs p.d.)</li> </ul>                                                                                                                                                                                                                                                                                                                                                                                                                                                                                                                                                                                                                                                                                                                                                                                                                                                                                                                                                                                                                                                                                                                                                                                                                                                                                                                                                                                                                                                                                                                                                                                                                                                                                 |

|             |                                                                                                                                                                                                                                                                                                                                                                                                                                                                                                                                                                                                                                                                                                                                                                                                                                                                                                                                                                                                                                                                                                                        |
|-------------|------------------------------------------------------------------------------------------------------------------------------------------------------------------------------------------------------------------------------------------------------------------------------------------------------------------------------------------------------------------------------------------------------------------------------------------------------------------------------------------------------------------------------------------------------------------------------------------------------------------------------------------------------------------------------------------------------------------------------------------------------------------------------------------------------------------------------------------------------------------------------------------------------------------------------------------------------------------------------------------------------------------------------------------------------------------------------------------------------------------------|
|             | <p><b>Age 11:</b></p> <ul style="list-style-type: none"> <li>- cycling/ walking to school (time per day)</li> <li>- Sport frequency (incl sport outside sport club) (times p.wk)</li> <li>- sport club member yes/no</li> <li>- use of asthma medication when sporting (never, sometimes, most of the time)</li> <li>- number of days p. wk on which physically active during at least 1 hr</li> <li>- TV/ video/ dvd (days p. wk and time p. day)</li> <li>- computer/ Gameboy (days p. wk and time p. day)</li> </ul> <p><b>Age 14:</b></p> <p>Questions age 11 + On how many days p. wk intensive phys act (with sweating and heavy breathing) during at least 0.5 hr</p> <ul style="list-style-type: none"> <li>- TV/ dvd (days p. wk and time p. day)</li> <li>- computer (incl laptop, Ipad, spel-computer, etc) (days p. wk and time p. day)</li> </ul> <p><b>Age 17:</b></p> <p>Questions on age 14 + Cycling (days p. wk and time p. day)</p> <p>Time spent sedentary per day during transport; during work or school/ study; with TV, computer, tablet, smartphone; during other leisure time activities</p> |
| SEATON      | <p><b>Fels PAQ</b></p> <ol style="list-style-type: none"> <li>1. In the last year, what sports did your child play at school (e.g. dancing, walking, jogging, running, badminton, tennis, basket ball, football, rugby, field hockey, aerobics)?</li> <li>2. In the last year, what sports or physically active games did your child play outside of school (e.g. dancing, dog walking, running, football, rugby, field hockey, skateboarding, bicycle riding, bowling)?</li> <li>3. When my child plays sports or games (s)he sweats</li> <li>4. During leisure time my child plays sports</li> <li>5. During leisure time my child watches television or reads</li> <li>6. How often does your child walk and/or bicycle to and from school?</li> <li>7. What jobs around the house does your child do that are physically active and how often do they do them (e.g. carrying laundry baskets, carrying food bags, watering flowers, weeding garden, feeding pets, walking large pet, picking up rubbish, picking up sticks, mowing the lawn)?</li> </ol>                                                           |
| Steps Study | <p><b>At 1, 2 and 4 yrs:</b> "How many hours per day does your child play outside?" Additional questions about attitudes towards physical activity. At 5 yrs: "Does your child attend an instructed sports (or related) activity? How many times per week, how long time per session"</p> <p><b>Yearly 1 to 5 years:</b> "How many hours per day does your child watch television, DVD, play videogames, use computer?"</p>                                                                                                                                                                                                                                                                                                                                                                                                                                                                                                                                                                                                                                                                                            |
| SWS         | <p>Hours actively on the move per day (derived from detailed questions about time spent sleeping, sitting etc)</p> <p>Questionnaire:</p> <p>On a typical day, how many hours does he/she generally spend watching television?</p> <p>Hours sitting per day (derived from detailed questions about time spent sleeping, sitting etc)</p> <p><b>Accelerometry at age 3-5 years:</b></p> <p>Epoch length 60 seconds. Counts per minute (cpm), intensity levels light (&gt;20 cpm), moderate (&gt;400 cpm), vigorous (&gt;600 cpm) during day time.</p>                                                                                                                                                                                                                                                                                                                                                                                                                                                                                                                                                                    |
| WHISTLER    | <p>Transportation to school (walking, cycling), outside of school walking, cycling, playing outside, playing inside, sports.</p>                                                                                                                                                                                                                                                                                                                                                                                                                                                                                                                                                                                                                                                                                                                                                                                                                                                                                                                                                                                       |

**Table B. Overview of cohort-specific questionnaires on asthma, wheeze, and medication use**

| Cohort                 | Asthma definition / wheeze / medication use                                                                                                                                                                                                                                                                                                                                                                                                                                                                                                                                                                                                                                                                                                                                                                                                                                                                                                                                                                                                                                                                                                                                                                                                                                                                                                                                                                                                                                                                                                                                                                                                                                                                                                                                                                                                                                                                                                                                                                                                                                                                                                                                                           |
|------------------------|-------------------------------------------------------------------------------------------------------------------------------------------------------------------------------------------------------------------------------------------------------------------------------------------------------------------------------------------------------------------------------------------------------------------------------------------------------------------------------------------------------------------------------------------------------------------------------------------------------------------------------------------------------------------------------------------------------------------------------------------------------------------------------------------------------------------------------------------------------------------------------------------------------------------------------------------------------------------------------------------------------------------------------------------------------------------------------------------------------------------------------------------------------------------------------------------------------------------------------------------------------------------------------------------------------------------------------------------------------------------------------------------------------------------------------------------------------------------------------------------------------------------------------------------------------------------------------------------------------------------------------------------------------------------------------------------------------------------------------------------------------------------------------------------------------------------------------------------------------------------------------------------------------------------------------------------------------------------------------------------------------------------------------------------------------------------------------------------------------------------------------------------------------------------------------------------------------|
| ABCD                   | <p><b>ISAAC based questionnaire at age 7-8 years:</b><br/> <i>'Has your child ever had asthma? If yes, was this diagnosed by a doctor?'</i><br/> <i>'Has your child ever had wheezing or whistling in the chest at any time in the past?'</i> and <i>'Has your child had wheezing or whistling in the chest in the past 12 months?'</i><br/>           No specific question about asthma medication. Only a general question about medicine use on 5 years old. <i>'Has your child been prescribed medicine by a doctor in the last 6 months?'</i></p>                                                                                                                                                                                                                                                                                                                                                                                                                                                                                                                                                                                                                                                                                                                                                                                                                                                                                                                                                                                                                                                                                                                                                                                                                                                                                                                                                                                                                                                                                                                                                                                                                                                |
| ABIS                   | Parental questionnaire/ISAAC, and physician-diagnosed, health register data                                                                                                                                                                                                                                                                                                                                                                                                                                                                                                                                                                                                                                                                                                                                                                                                                                                                                                                                                                                                                                                                                                                                                                                                                                                                                                                                                                                                                                                                                                                                                                                                                                                                                                                                                                                                                                                                                                                                                                                                                                                                                                                           |
| BAMSE                  | <p>At least 3 episodes of wheeze in the last 12 months and/or at least 1 episode of wheeze in the last 12 months combined with prescription of inhaled steroids for symptoms of asthma.<br/>           Has a doctor diagnosed your child as having asthma?<br/>           At least 1 episode of wheeze in the last 12 months<br/>           Has your child been prescribed any medicines for treatment of asthma or breathing difficulties the last 12 months?</p>                                                                                                                                                                                                                                                                                                                                                                                                                                                                                                                                                                                                                                                                                                                                                                                                                                                                                                                                                                                                                                                                                                                                                                                                                                                                                                                                                                                                                                                                                                                                                                                                                                                                                                                                    |
| CHOP                   | <p>Did a physician ever diagnose asthma in your child<br/>           No question on wheeze<br/>           Medication use in general (not specifically for asthma)</p>                                                                                                                                                                                                                                                                                                                                                                                                                                                                                                                                                                                                                                                                                                                                                                                                                                                                                                                                                                                                                                                                                                                                                                                                                                                                                                                                                                                                                                                                                                                                                                                                                                                                                                                                                                                                                                                                                                                                                                                                                                 |
| COPSAC <sub>2000</sub> | Physician diagnosed asthma                                                                                                                                                                                                                                                                                                                                                                                                                                                                                                                                                                                                                                                                                                                                                                                                                                                                                                                                                                                                                                                                                                                                                                                                                                                                                                                                                                                                                                                                                                                                                                                                                                                                                                                                                                                                                                                                                                                                                                                                                                                                                                                                                                            |
| DNBC                   | <p><b>Web-based or paper-mailed questionnaire to mother/parent (child age 7 years):</b><br/>           Z048. Has your child ever had asthma?<br/>           Z051. Has a doctor ever said that your daughter/son had asthma?<br/> <b>Web-based questionnaire to adult when child aged 11 years:</b><br/>           F085 Has [child name] ever had asthma?<br/>           (no questions on doctor-diagnosis)<br/>           F086 How old was [child name] when [child name] had [his/hers] first asthma attack?<br/>           F087 Has [child name] had an asthma attack in the past year?<br/>           F088 How old was [child name] when [child name] had his/ her latest asthma attack?<br/>           F097 Has [child name] a peakflow-meter at home?<br/> <b>Web-based or paper-mailed questionnaire to mother/parent (child age 7 years):</b><br/>           Z043. Has your child ever had wheezing or whistling in the chest at any time in the past?<br/>           Z044. Has your child had wheezing or whistling in the chest in the last 12 months?<br/>           Z045. How many attacks of wheezing has your child had in the last 12 months?<br/> <b>Web-based questionnaire to adult when child aged 11 years:</b><br/>           F082 How many periods of wheezing has [child name]s had during the past year?<br/>           F089 Has [child name]s breathing sounded wheezy during or after exercise in the past year?<br/>           (and more questions on nightly cough etc)<br/> <b>Web-based or paper-mailed questionnaire to mother/parent (child age 7 years):</b><br/>           Z052. Has your daughter/son taken asthma medicine during the past 12 months?<br/>           If yes:<br/>           Which type of medicine?<br/> <b>Web-based questionnaire to adult when child aged 11 years:</b><br/>           F091 Has [child name] been given medicine for [his/hers] wheezy breathing or asthma (e.g. inhalators, spray or pills) in the past year?<br/>           F092_1-4 What type of medicine has [child name] received?<br/>           F093, F094, F095: What was the name of the type?<br/>           How often has [child names] received these products?</p> |
| EDEN                   | Physician-diagnosed asthma, ISAAC questionnaire                                                                                                                                                                                                                                                                                                                                                                                                                                                                                                                                                                                                                                                                                                                                                                                                                                                                                                                                                                                                                                                                                                                                                                                                                                                                                                                                                                                                                                                                                                                                                                                                                                                                                                                                                                                                                                                                                                                                                                                                                                                                                                                                                       |
| G21                    | <p><b>ISAAC based questionnaire (4 and 7 years of age):</b><br/> <i>"has you child ever had asthma diagnosed by a doctor?"</i><br/> <i>"if so, in the last 12 months, has your child had an asthma attack?"</i><br/>           ISAAC questions on physician diagnosed allergy, eczema, rhinitis.<br/>           ISAAC based questionnaire:<br/> <i>"Has your child ever had wheezing in the chest?"</i><br/> <i>"Has your child ever had wheezing in the chest in the past 12 months?" number of wheezing attacks in the last 12 months.</i><br/> <i>"In the last 12 months, how often did he/she wake up due to wheezing?"</i><br/> <i>"In the last 12 months, did he/she become short of breath during a conversation due to wheezing?"</i></p>                                                                                                                                                                                                                                                                                                                                                                                                                                                                                                                                                                                                                                                                                                                                                                                                                                                                                                                                                                                                                                                                                                                                                                                                                                                                                                                                                                                                                                                     |

|          |                                                                                                                                                                                                                                                                                                                                                                                                                                                                                                                                                                                                                                                                                                                                                                                                                                                                                                                        |
|----------|------------------------------------------------------------------------------------------------------------------------------------------------------------------------------------------------------------------------------------------------------------------------------------------------------------------------------------------------------------------------------------------------------------------------------------------------------------------------------------------------------------------------------------------------------------------------------------------------------------------------------------------------------------------------------------------------------------------------------------------------------------------------------------------------------------------------------------------------------------------------------------------------------------------------|
|          | Questionnaire: "Did your child use any prescription medication in the past 12 months for asthma?" (name of the medication/quantity per day/how many times per day/duration (days)) (4 years)                                                                                                                                                                                                                                                                                                                                                                                                                                                                                                                                                                                                                                                                                                                           |
| Gen R    | ISAAC based questionnaire:<br>"has your child ever had asthma diagnosed by a doctor?"<br>"has your child ever suffered from a whistling noise in the chest?" (1y); "has your child had problems with a wheezing chest during the last year?" (2,3, 4, 9y); "Did your child ever suffer from chest wheezing?" "If yes, during the past 12 months, did you child ever suffer from chest wheezing?" (6y)<br>Questionnaire: "Did your child use any prescription medication in the past 12 months for complaints of the lungs, allergy or skin?"                                                                                                                                                                                                                                                                                                                                                                           |
| GINplus  | <b>Questionnaire (at each follow-up):</b><br>it was asked from birth to age 15 for each year of life since the previous follow-up whether the child was diagnosed with asthma by a physician ("doctor diagnosis at the age of x years: asthma")<br><b>Questionnaire (at 6, 10, 15 years):</b><br>"Has your child ever had asthma?"<br><b>Questionnaire (at each follow-up):</b><br>"Has your child had wheezing or whistling in the chest in the past 12 months?" (asked for age 1,2,3 and 4)<br>"Has your child had wheezing or whistling in the chest during the past 12 months?" (asked at ages 6, 10 and 15)<br><b>Questionnaire:</b><br>at age 6: "Has your child been treated for asthma in the 5 <sup>th</sup> or 6 <sup>th</sup> year of life?"<br>at ages 10 and 15: "Has your child been treated for asthma in the past 12 months?"                                                                          |
| HUMIS    | Has your child ever suffered, or is currently suffering from any of the following long-term illnesses or health problems? Asthma... no/yes; If yes, was the illness/problem confirmed by a doctor.<br>Additionally, linkage to <b>Norwegian Patient Registry</b><br>"Has the child ever had, or does the child have, any of the following symptoms or health problems? <b>Tightness/wheezing/whistling in the chest...</b><br>Tightness/wheezing in the chest during or after physical exercise no/yes; At what age? 3 years or older;<br>Number of times last 12 months: XX"<br>"During the last year, has the child used medication, spray, inhaler or other medications for treatment of asthma? No/yes; If yes, Name of medication used on a regular basis: XXX; Name of medications used during attacks: XXX; When did your child last use medications for asthma? Yesterday; Last 7 days; Last month; Last year" |
| INMA     | Parental questionnaire<br>"In the last 12 months, Has your child had ever suffered asthma?"<br>"Has your child ever been diagnosed by a doctor as having asthma?"<br>Parental questionnaire<br>"Has your child ever had wheezing in the chest in the past 12 months?"<br>"Has your child ever had wheezing in the chest in the past 24 months?"<br>Parental questionnaire<br>"Has your child taken any medicines for asthma in the last 24 months? (include any inhalers, nebulisers, tablets, oral corticosteroids or liquid medicines)"<br>"Has your child taken any medicines for asthma/breathing difficulties in last 12 months?"                                                                                                                                                                                                                                                                                 |
| KOALA    | ISAAC questionnaire on asthma, wheezing, physician diagnosed asthma, asthma medication use                                                                                                                                                                                                                                                                                                                                                                                                                                                                                                                                                                                                                                                                                                                                                                                                                             |
| Lifeways | Questionnaire/physician diagnosed.                                                                                                                                                                                                                                                                                                                                                                                                                                                                                                                                                                                                                                                                                                                                                                                                                                                                                     |
| LISA     | <b>Questionnaire (at each follow-up):</b><br>it was asked for ages 1, 1.5, and 2 years whether the child was diagnosed with asthma by a physician during the past 6 months<br>it was asked from age 3 to age 15 for each year of life since the previous follow-up whether the child was diagnosed with asthma by a physician ("doctor diagnosis at the age of x years: asthma")<br><b>Questionnaire (at 6, 10, 15 years):</b><br>"Has your child ever had asthma?"<br><b>Questionnaire (at each follow-up):</b><br>"Has your child had wheezing or whistling in the chest during the past 6 months?" (asked for age 0.5, 1, 1.5 and 2)                                                                                                                                                                                                                                                                                |



|             |                                                                                                                                                                                                                                                                                                                                                                                                                                                                                                                                                                                                                                                                                                                                                                                                                                                                                                                                                                                                                                                                                                                                                                                                               |
|-------------|---------------------------------------------------------------------------------------------------------------------------------------------------------------------------------------------------------------------------------------------------------------------------------------------------------------------------------------------------------------------------------------------------------------------------------------------------------------------------------------------------------------------------------------------------------------------------------------------------------------------------------------------------------------------------------------------------------------------------------------------------------------------------------------------------------------------------------------------------------------------------------------------------------------------------------------------------------------------------------------------------------------------------------------------------------------------------------------------------------------------------------------------------------------------------------------------------------------|
|             | <p>"Has your child had wheezing or whistling in the chest during the past 12 months?" (asked at age 4, 6, 10 and 15)</p> <p><b>Questionnaire:</b></p> <p>at age 6: "Has your child been treated for asthma in the 5<sup>th</sup> or 6<sup>th</sup> year of life?"</p> <p>at ages 10 and 15: "Has your child been treated for asthma in the past 12 months?"</p>                                                                                                                                                                                                                                                                                                                                                                                                                                                                                                                                                                                                                                                                                                                                                                                                                                               |
| LRC         | <p><b>Age 1-5 years (1998) and 4-8 years (2001):</b></p> <p>Has any doctor or hospital told you that he/she has asthma or bronchitis?</p> <p>Does your child attend a clinic or see a doctor for wheezing? (or asthma or bronchitis?)</p> <p>Has your child had wheezing or whistling in the chest in the last 12 months?</p> <p>Has your child ever taken any medicine for wheezing? (or asthma or bronchitis)</p> <p><b>6-10 years (2003):</b></p> <p>Has any doctor or hospital told you that he/she has asthma or bronchitis?</p> <p>Has your child had wheezing or whistling in the chest in the last 12 months?</p> <p>Did your child take any of the following during the last 12 months? (Salbutamol, Ventolin, Bricanyl, Pulmicort, Flixotide, Becotide, Beclovent, Serevent, Seretide, Symbicort)</p> <p><b>Age 13-17 years (2010):</b></p> <p>Have you ever been diagnosed with asthma by a doctor or a nurse?</p> <p>Have you had wheezing or whistling in the chest in the last 12 months?</p> <p>In the last 12 months, did you take any of the following medicines or inhalers? (Salbutamol, Ventolin, Bricanyl, Pulmicort, Flixotide, Becotide, Beclovent, Serevent, Seretide, Symbicort)</p> |
| Lucki       | <p>ISAAC questions on physician diagnosed asthma (bronchitis, allergy, eczema) and prescribed asthma medication.</p> <p>Full ISAAC module questions on wheeze (number of attacks etc.)</p> <p>Pharmacy registry data</p>                                                                                                                                                                                                                                                                                                                                                                                                                                                                                                                                                                                                                                                                                                                                                                                                                                                                                                                                                                                      |
| PIAMA       | <p><b>At ages 1,2,3,4,5,6,7,8,11,14,17: ISAAC questions</b></p> <p><b>At ages 3,4,5,6,7,8,11,14,17 'MeDALL asthma definition'</b> (= presence of 2 out of the 3 following items: doctor diagnosed asthma ever; wheeze in the last 12 months; use of asthma medication in the last 12 months)</p> <p><b>At ages 3,4,5,6,7,8,11,14,17:</b> questionnaire based different types of asthma medication, incl ICS and bronchodilators</p>                                                                                                                                                                                                                                                                                                                                                                                                                                                                                                                                                                                                                                                                                                                                                                           |
| SEATON      | Physician diagnosed asthma                                                                                                                                                                                                                                                                                                                                                                                                                                                                                                                                                                                                                                                                                                                                                                                                                                                                                                                                                                                                                                                                                                                                                                                    |
| Steps Study | <p>ISAAC based questionnaires on asthma and wheezing</p> <p>"Did a physician ever diagnose asthma in your child?"</p> <p>"Did your child ever experience wheezing?"</p> <p>"Did your child experience wheezing during the last 12 months?"</p> <p>Questions on frequency and severity of wheezing symptoms during the last 12 months</p> <p>Open question on medications:</p> <p>"Does your child have any long-term medication? Please name the medication"</p>                                                                                                                                                                                                                                                                                                                                                                                                                                                                                                                                                                                                                                                                                                                                              |
| SWS         | <p>Questionnaire asking about physician-diagnosed asthma</p> <p>ISAAC questionnaire</p> <p>ISAAC Questionnaire: Has he/she received inhalers or other medication for asthma prescribed by a doctor in the past 12 months?</p>                                                                                                                                                                                                                                                                                                                                                                                                                                                                                                                                                                                                                                                                                                                                                                                                                                                                                                                                                                                 |
| WHISTLER    | <p>Did your child ever suffer from asthma?</p> <p>Did your child ever suffer from wheezing?</p> <p>Did your child suffer from wheezing in the last 12 months?</p> <p>Pharmacy registry data and GP registry data</p>                                                                                                                                                                                                                                                                                                                                                                                                                                                                                                                                                                                                                                                                                                                                                                                                                                                                                                                                                                                          |

**Table C. Covariables of participating cohorts**

| Cohort<br>(country)                 | n      | Sex              |                 | Gestational Age |                 | Birth weight  |                 | Parity            |                 | Parental history<br>of asthma |                 | Parental history of<br>atopy |                 | Maternal smoke<br>in pregnancy |                 | Environmental<br>Tobacco Smoke |                 |
|-------------------------------------|--------|------------------|-----------------|-----------------|-----------------|---------------|-----------------|-------------------|-----------------|-------------------------------|-----------------|------------------------------|-----------------|--------------------------------|-----------------|--------------------------------|-----------------|
|                                     |        | boy<br>%(n)      | missing<br>%(n) | mean<br>(SD)    | missing<br>%(n) | mean<br>(SD)  | missing<br>%(n) | firstborn<br>%(n) | missing<br>%(n) | yes<br>%(n)                   | missing<br>%(n) | yes<br>%(n)                  | missing<br>%(n) | yes<br>%(n)                    | missing<br>%(n) | yes<br>%(n)                    | missing<br>%(n) |
| ABCD<br>(Netherlands)               | 2,887  | 51.3<br>(1,481)  | 0.0<br>(0)      | 39.5<br>(1.7)   | 0.2<br>(5)      | 3499<br>(533) | 0.5<br>(14)     | 57.8<br>(1,670)   | 0.0<br>(0)      | 14.4<br>(371)                 | 10.9<br>(314)   | 51.4<br>(1322)               | 10.9<br>(315)   | 7.2<br>(208)                   | 0.0<br>(0)      | 6.7<br>(192)                   | 0.0<br>(1)      |
| ABIS<br>(Sweden)                    | 8,327  | 52.3<br>(4,355)  | 0.0<br>(0)      | 39.7<br>(1.7)   | 3.4<br>(286)    | 3584<br>(548) | 1.8<br>(153)    | 42.0<br>(3423)    | 2.1<br>(173)    | 9.3<br>(776)                  | 0.0<br>(0)      | 28.8<br>(2,400)              | 0.0<br>(0)      | 7.9<br>(644)                   | 1.9<br>(159)    | 4.8<br>(331)                   | 17.9<br>(1,488) |
| BAMSE<br>(Sweden)                   | 3,181  | 49.7<br>(1,581)  | 0.0<br>(0)      | 39.8<br>(2.0)   | 0.0<br>(0)      | 3530<br>(560) | 1.0<br>(31)     | 52.6<br>(1,672)   | 0.0<br>(0)      | 19.6<br>(620)                 | 0.7<br>(23)     | -<br>(-)                     | -<br>(-)        | 13.6<br>(431)                  | 0.1<br>(2)      | 18.0<br>(564)                  | 1.2<br>(39)     |
| CHOP<br>(Multiple)*                 | 632    | 47.8<br>(302)    | 0.0<br>(0)      | 39.8<br>(1.2)   | 0.2<br>(1)      | 3298<br>(345) | 0.0<br>(0)      | 57.9<br>(365)     | 0.3<br>(2)      | -<br>(-)                      | -<br>(-)        | 40.9<br>(256)                | 0.9<br>(6)      | 18.9<br>(119)                  | 0.2<br>(1)      | -<br>(-)                       | -<br>(-)        |
| COPSAC <sub>2000</sub><br>(Denmark) | 272    | 48.9<br>(133)    | 0.0<br>(0)      | 39.9<br>(1.6)   | 0.0<br>(0)      | 3541<br>(545) | 0.0<br>(0)      | 61.0<br>(166)     | 0.0<br>(0)      | 100.0<br>(272)                | 0.0<br>(0)      | 100.0<br>(272)               | 0.0<br>(0)      | 22.4<br>(61)                   | 0.0<br>(0)      | 26.2<br>(71)                   | 0.4<br>(1)      |
| DNBC<br>(Denmark)                   | 80,633 | 50.9<br>(41,042) | 0.0<br>(0)      | 39.6<br>(1.7)   | 0.1<br>(108)    | 3595<br>(553) | 0.5<br>(386)    | 45.5<br>(34,033)  | 7.3<br>(5,915)  | 8.4<br>(6,471)                | 5.0<br>(4,004)  | 21.3<br>(16,307)             | 5.2<br>(4,219)  | 25.6<br>(20,471)               | 0.7<br>(584)    | 14.8<br>(11,239)               | 5.8<br>(4,713)  |
| Eden<br>(France)                    | 876    | 53.4<br>(468)    | 0.0<br>(0)      | 39.3<br>(1.7)   | 0.0<br>(0)      | 3290<br>(494) | 0.0<br>(0)      | 29.6<br>(206)     | 20.5<br>(180)   | 18.4<br>(161)                 | 0.0<br>(0)      | 17.9<br>(157)                | 0.0<br>(0)      | 21.7<br>(173)                  | 8.8<br>(77)     | 35.5<br>(274)                  | 11.9<br>(104)   |
| G21<br>(Portugal)                   | 7,310  | 50.9<br>(3,723)  | 0.0<br>(0)      | 38.5<br>(1.9)   | 0.1<br>(8)      | 3155<br>(528) | 0.0<br>(0)      | 57.8<br>(4,149)   | 1.9<br>(138)    | 5.4<br>(380)                  | 4.3<br>(315)    | -<br>(-)                     | -<br>(-)        | 21.7<br>(1,562)                | 1.6<br>(115)    | 17.2<br>(1,170)                | 6.8<br>(498)    |
| Gen R<br>(Netherlands)              | 5,149  | 49.8<br>(2,566)  | 0.0<br>(0)      | 39.8<br>(1.9)   | 0.6<br>(31)     | 3433<br>(573) | 0.1<br>(7)      | 58.8<br>(2,933)   | 3.1<br>(160)    | 15.7<br>(554)                 | 31.3<br>(1,613) | 59.9<br>(2,350)              | 23.8<br>(1,226) | 21.9<br>(1,011)                | 10.5<br>(539)   | 13.0<br>(556)                  | 16.7<br>(859)   |
| GINIplus<br>(Germany)               | 4,010  | 50.9<br>(2,043)  | 0.0<br>(0)      | 39.7<br>(1.4)   | 16.9<br>(676)   | 3469<br>(467) | 4.2<br>(170)    | -<br>(-)          | -<br>(-)        | 14.2<br>(562)                 | 1.0<br>(40)     | 53.7<br>(2,131)              | 1.1<br>(43)     | 14.0<br>(553)                  | 1.4<br>(56)     | 30.8<br>(1,201)                | 2.8<br>(113)    |
| HUMIS<br>(Norway)                   | 763    | 50.5<br>(324)    | 15.9<br>(121)   | 39.8<br>(2.1)   | 15.9<br>(121)   | 3574<br>(641) | 15.9<br>(121)   | 45.8<br>(283)     | 19.0<br>(145)   | 14.3<br>(85)                  | 21.9<br>(167)   | 45.2<br>(268)                | 22.3<br>(170)   | 7.2<br>(45)                    | 17.8<br>(136)   | 5.6<br>(42)                    | 1.7<br>(13)     |
| INMA Asturias<br>(Spain)            | 340    | 54.1<br>(184)    | 0.0<br>(0)      | 39.4<br>(1.6)   | 0.0<br>(0)      | 3254<br>(474) | 0.0<br>(0)      | 62.4<br>(212)     | 0.0<br>(0)      | 14.4<br>(49)                  | 0.0<br>(0)      | 21.8<br>(74)                 | 0.0<br>(0)      | 27.1<br>(88)                   | 4.4<br>(15)     | 56.6<br>(192)                  | 0.3<br>(1)      |
| INMA Gipuzkoa<br>(Spain)            | 351    | 49.9<br>(175)    | 0.0<br>(0)      | 39.8<br>(1.5)   | 0.0<br>(0)      | 3294<br>(438) | 0.9<br>(3)      | 56.7<br>(199)     | 0.0<br>(0)      | 13.7<br>(48)                  | 0.0<br>(0)      | 29.3<br>(103)                | 0.0<br>(0)      | 21.4<br>(73)                   | 2.8<br>(10)     | 47.1<br>(165)                  | 0.3<br>(1)      |
| INMA Menorca<br>(Spain)             | 471    | 51.2<br>(241)    | 0.0<br>(0)      | 39.3<br>(1.8)   | 0.2<br>(1)      | 3209<br>(471) | 3.0<br>(14)     | 41.8<br>(197)     | 0.0<br>(0)      | 12.4<br>(58)                  | 0.6<br>(3)      | 51.7<br>(215)                | 11.7<br>(55)    | 35.3<br>(165)                  | 0.6<br>(3)      | 48.3<br>(210)                  | 7.6<br>(36)     |
| INMA Sabadell<br>(Spain)            | 534    | 52.4<br>(280)    | 0.0<br>(0)      | 39.8<br>(1.4)   | 0.0<br>(0)      | 3276<br>(423) | 0.0<br>(0)      | 55.9<br>(295)     | 1.1<br>(6)      | 15.0<br>(70)                  | 12.4<br>(66)    | 35.7<br>(168)                | 11.8<br>(63)    | 26.3<br>(138)                  | 1.9<br>(10)     | 52.1<br>(275)                  | 1.1<br>(6)      |
| INMA Valencia<br>(Spain)            | 460    | 50.9<br>(234)    | 0.0<br>(0)      | 39.6<br>(1.7)   | 0.0<br>(0)      | 3233<br>(493) | 0.0<br>(0)      | 56.7<br>(261)     | 0.0<br>(0)      | 13.3<br>(61)                  | 0.0<br>(0)      | 31.1<br>(143)                | 0.0<br>(0)      | 37.6<br>(173)                  | 0.0<br>(0)      | 64.9<br>(298)                  | 0.2<br>(1)      |

| Cohort<br>(country)        | n     | Sex             |                 | Gestational Age |                 | Birth weight  |                 | Parity            |                 | Parental history<br>of asthma |                 | Parental history of<br>atopy |                 | Maternal smoke<br>in pregnancy |                 | Environmental<br>Tobacco Smoke |                 |
|----------------------------|-------|-----------------|-----------------|-----------------|-----------------|---------------|-----------------|-------------------|-----------------|-------------------------------|-----------------|------------------------------|-----------------|--------------------------------|-----------------|--------------------------------|-----------------|
|                            |       | boy<br>%(n)     | missing<br>%(n) | mean<br>(SD)    | missing<br>%(n) | mean<br>(SD)  | missing<br>%(n) | firstborn<br>%(n) | missing<br>%(n) | yes<br>%(n)                   | missing<br>%(n) | yes<br>%(n)                  | missing<br>%(n) | yes<br>%(n)                    | missing<br>%(n) | yes<br>%(n)                    | missing<br>%(n) |
| KOALA<br>(Netherlands)     | 2,222 | 50.7<br>(1,126) | 0.0<br>(0)      | 39.5<br>(1.5)   | 0.4<br>(9)      | 3516<br>(506) | 0.0<br>(1)      | 44.5<br>(980)     | 0.9<br>(21)     | 17.7<br>(386)                 | 1.9<br>(43)     | 59.6<br>(1,307)              | 1.4<br>(30)     | 5.4<br>(119)                   | 0.0<br>(0)      | 10.2<br>(227)                  | 0.0<br>(1)      |
| Lifeways<br>(Ireland)      | 555   | 47.9<br>(266)   | 0.0<br>(0)      | 39.9<br>(1.9)   | 9.2<br>(51)     | 3526<br>(566) | 0.9<br>(5)      | 41.9<br>(229)     | 1.6<br>(9)      | 16.9<br>(69)                  | 26.3<br>(146)   | -<br>-                       | -<br>-          | 17.6<br>(95)                   | 2.5<br>(14)     | 36.3<br>(200)                  | 0.7<br>(4)      |
| LISA<br>(Germany)          | 2,493 | 51.5<br>(1,284) | 0.0<br>(0)      | 39.8<br>(1.2)   | 1.5<br>(37)     | 3476<br>(444) | 0.0<br>(0)      | 53.0<br>(1,314)   | 0.6<br>(14)     | 11.5<br>(273)                 | 4.7<br>(116)    | 56.2<br>(1,306)              | 6.8<br>(170)    | 15.3<br>(367)                  | 3.6<br>(89)     | 27.2<br>(677)                  | 0.1<br>(3)      |
| LRC<br>(United Kingdom)    | 5,948 | 52.0<br>(3,093) | 0.0<br>(0)      | 39.2<br>(1.9)   | 2.7<br>(160)    | 3305<br>(578) | 2.5<br>(151)    | 41.7<br>(2,415)   | 2.7<br>(163)    | 30.5<br>(1,495)               | 17.6<br>(1,049) | 55.8<br>(2,801)              | 15.6<br>(926)   | 14.2<br>(726)                  | 14.3<br>(852)   | 32.8<br>(1,841)                | 5.7<br>(339)    |
| Lucki<br>(Netherlands)     | 828   | 49.5<br>(410)   | 0.0<br>(0)      | 39.2<br>(1.8)   | 0.2<br>(2)      | 3404<br>(525) | 0.2<br>(2)      | 50.8<br>(410)     | 2.5<br>(21)     | 21.7<br>(171)                 | 5.0<br>(41)     | 65.9<br>(519)                | 5.0<br>(41)     | 10.6<br>(88)                   | 0.0<br>(0)      | 7.6<br>(63)                    | 0.0<br>(0)      |
| PIAMA<br>(Netherlands)     | 3,591 | 51.7<br>(1,855) | 0.0<br>(1)      | 39.9<br>(1.6)   | 0.3<br>(11)     | 3520<br>(541) | 0.5<br>(18)     | 49.9<br>(1,788)   | 0.1<br>(5)      | 13.1<br>(466)                 | 0.9<br>(32)     | 50.0<br>(1,796)              | 0.0<br>(0)      | 16.8<br>(597)                  | 0.8<br>(29)     | 24.2<br>(867)                  | 0.1<br>(4)      |
| SEATON<br>(United Kingdom) | 212   | 49.5<br>(105)   | 0.0<br>(0)      | 39.6<br>(1.6)   | 5.2<br>(11)     | 3521<br>(540) | 5.7<br>(12)     | 38.3<br>(77)      | 5.2<br>(11)     | 25.9<br>(55)                  | 0.0<br>(0)      | 67.5<br>(137)                | 4.2<br>(9)      | 17.5<br>(37)                   | 0.0<br>(0)      | 19.0<br>(40)                   | 0.9<br>(2)      |
| STEPS Study<br>(Finland)   | 832   | 52.0<br>(433)   | 0.0<br>(0)      | 39.8<br>(1.6)   | 1.3<br>(11)     | 3514<br>(511) | 1.3<br>(11)     | 58.1<br>(483)     | 0.0<br>(0)      | 19.8<br>(131)                 | 20.4<br>(170)   | 34.3<br>(230)                | 19.5<br>(162)   | 2.1<br>(13)                    | 26.2<br>(218)   | 19.0<br>(151)                  | 4.6<br>(38)     |
| SWS<br>(United Kingdom)    | 2,549 | 52.1<br>(1,329) | 0.0<br>(0)      | 39.8<br>(1.8)   | 0.0<br>(0)      | 3443<br>(544) | 1.0<br>(26)     | 53.2<br>(1,354)   | 0.1<br>(3)      | 36.9<br>(839)                 | 10.8<br>(276)   | 67.1<br>(1,433)              | 16.2<br>(414)   | 14.4<br>(349)                  | 4.6<br>(117)    | 35.8<br>(905)                  | 0.9<br>(23)     |
| WHISTLER<br>(Netherlands)  | 645   | 47.9<br>(304)   | 1.7<br>(11)     | 39.5<br>(1.4)   | 2.9<br>(19)     | 3537<br>(496) | 2.9<br>(19)     | -<br>-            | -<br>-          | 13.8<br>(81)                  | 8.7<br>(56)     | 65.6<br>(356)                | 15.8<br>(102)   | 16.8<br>(105)                  | 3.1<br>(20)     | 6.4<br>(41)                    | 0.2<br>(1)      |

Continues on next page

**Table C.** (continued)

| Cohort<br>(country)                 | Maternal age  |                 | Maternal education |                  |                  |                 | Maternal BMI  |                 | Breastfeeding    |                  | Breastfeeding<br>duration in months |                  |
|-------------------------------------|---------------|-----------------|--------------------|------------------|------------------|-----------------|---------------|-----------------|------------------|------------------|-------------------------------------|------------------|
|                                     | mean<br>(SD)  | missing<br>%(n) | low<br>%(n)        | mid<br>%(n)      | high<br>%(n)     | missing<br>%(n) | mean<br>(SD)  | missing<br>%(n) | yes<br>%(n)      | missing<br>%(n)  | mean<br>(SD)                        | missing<br>%(n)  |
| ABCD<br>(Netherlands)               | 32.3<br>(4.2) | 0.0<br>(0)      | 9.1<br>(262)       | 18.6<br>(535)    | 72.3<br>(2,080)  | 0.3<br>(10)     | 22.8<br>(3.7) | 5.1<br>(148)    | 85.2<br>(2,459)  | 0.0<br>(1)       | 4.9<br>(3.7)                        | 0.0<br>(1)       |
| ABIS<br>(Sweden)                    | 29.9<br>(4.5) | 0.1<br>(7)      | 6.2<br>(510)       | 58.3<br>(4,756)  | 35.5<br>(2,896)  | 2.0<br>(165)    | 23.7<br>(3.8) | 21.1<br>(1,755) | 96.2<br>(6,342)  | 20.8<br>(1,734)  | 7.2<br>(2.3)                        | 21.1<br>(1,734)  |
| BAMSE<br>(Sweden)                   | 30.8<br>(4.5) | 0.0<br>(1)      | 32.1<br>(1,018)    | 24.7<br>(783)    | 43.1<br>(1,366)  | 0.4<br>(14)     | -<br>-        | -<br>-          | 97.2<br>(3,092)  | 0.0<br>(0)       | 8.7<br>(3.4)                        | 2.8<br>(89)      |
| CHOP<br>(Multiple)*                 | 31.2<br>(4.7) | 0.2<br>(1)      | 17.9<br>(113)      | 50.6<br>(320)    | 31.5<br>(199)    | 0.0<br>(0)      | 23.4<br>(4.2) | 3.3<br>(21)     | 33.4<br>(211)    | 0.0<br>(0)       | -<br>-                              | -<br>-           |
| COPSAC <sub>2000</sub><br>(Denmark) | 30.2<br>(4.2) | 0.0<br>(0)      | 38.8<br>(101)      | 46.9<br>(122)    | 14.2<br>(37)     | 4.4<br>(12)     | -<br>-        | -<br>-          | 99.3<br>(270)    | 0.0<br>(0)       | 9.0<br>(5.5)                        | 0.0<br>(0)       |
| DNBC<br>(Denmark)                   | 30.0<br>(4.3) | 0.0<br>(0)      | 8.8<br>(6,748)     | 37.4<br>(28,606) | 53.8<br>(41,111) | 5.2<br>(4,168)  | 23.5<br>(4.2) | 6.4<br>(5,147)  | 98.4<br>(63,170) | 20.4<br>(16,457) | 5.2<br>(1.5)                        | 20.4<br>(16,457) |
| Eden<br>(France)                    | 30.3<br>(4.8) | 0.0<br>(0)      | 22.7<br>(197)      | 17.3<br>(150)    | 60.0<br>(520)    | 1.0<br>(9)      | 23.4<br>(4.5) | 0.8<br>(7)      | 72.0<br>(630)    | 0.1<br>(1)       | -<br>-                              | -<br>-           |
| G21<br>(Portugal)                   | 29.3<br>(5.4) | 0.0<br>(0)      | 46.4<br>(3,370)    | 27.3<br>(1,987)  | 26.3<br>(1,910)  | 0.6<br>(43)     | 23.9<br>(4.3) | 7.8<br>(570)    | 93.1<br>(6,640)  | 2.4<br>(178)     | 10.3<br>(10.1)                      | 27.9<br>(2,039)  |
| Gen R<br>(Netherlands)              | 31.5<br>(4.6) | 0.0<br>(0)      | 4.9<br>(238)       | 39.1<br>(1,908)  | 56.1<br>(2,740)  | 5.1<br>(263)    | 24.5<br>(4.1) | 10.7<br>(550)   | 92.5<br>(4,062)  | 14.7<br>(756)    | 5.1<br>(3.8)                        | 36.0<br>(1,854)  |
| GINIplus<br>(Germany)               | 31.2<br>(4.1) | 0.0<br>(1)      | 15.1<br>(570)      | 39.9<br>(1,502)  | 45.0<br>(1,696)  | 6.0<br>(242)    | 22.7<br>(3.4) | 37.4<br>(1,501) | 87.1<br>(3,344)  | 4.3<br>(171)     | 4.3<br>(2.3)                        | 4.5<br>(179)     |
| HUMIS<br>(Norway)                   | 30.1<br>(4.5) | 15.9<br>(121)   | 4.8<br>(31)        | 9.2<br>(59)      | 85.9<br>(550)    | 16.1<br>(123)   | 23.9<br>(4.1) | 16.3<br>(124)   | 98.7<br>(610)    | 19.0<br>(145)    | 11.8<br>(5.3)                       | 24.5<br>(187)    |
| INMA Asturias<br>(Spain)            | 33.3<br>(4.2) | 0.0<br>(0)      | 14.1<br>(48)       | 44.1<br>(150)    | 41.8<br>(142)    | 0.0<br>(0)      | 23.7<br>(4.1) | 0.0<br>(0)      | 76.1<br>(248)    | 4.1<br>(14)      | 5.1<br>(6.9)                        | 4.1<br>(14)      |
| INMA Gipuzkoa<br>(Spain)            | 32.7<br>(3.2) | 0.0<br>(0)      | 10.9<br>(38)       | 35.4<br>(124)    | 53.7<br>(188)    | 0.3<br>(1)      | 22.9<br>(3.5) | 0.0<br>(0)      | 90.8<br>(306)    | 4.0<br>(14)      | 6.8<br>(4.7)                        | 4.0<br>(14)      |
| INMA Menorca<br>(Spain)             | 30.0<br>(4.6) | 3.0<br>(14)     | 58.5<br>(266)      | 28.1<br>(128)    | 13.4<br>(61)     | 3.4<br>(16)     | 22.8<br>(3.7) | 3.6<br>(17)     | 82.4<br>(388)    | 0.0<br>(0)       | 1.1<br>(1.0)                        | 0.0<br>(0)       |
| INMA Sabadell<br>(Spain)            | 31.8<br>(4.3) | 0.2<br>(1)      | 22.9<br>(119)      | 44.1<br>(229)    | 32.9<br>(171)    | 2.8<br>(15)     | 23.8<br>(4.5) | 2.4<br>(13)     | 93.6<br>(499)    | 0.2<br>(1)       | 6.3<br>(4.5)                        | 0.2<br>(1)       |
| INMA Valencia<br>(Spain)            | 31.8<br>(4.2) | 0.7<br>(3)      | 27.2<br>(125)      | 42.4<br>(195)    | 30.4<br>(140)    | 0.0<br>(0)      | 23.6<br>(4.2) | 0.0<br>(0)      | 83.9<br>(386)    | 0.0<br>(0)       | 5.5<br>(4.5)                        | 0.0<br>(0)       |

| Cohort<br>(country)        | Maternal age  |                 | Maternal education |                 |                 |                 | Maternal BMI  |                 | Breastfeeding   |                 | Breastfeeding duration in months |                 |
|----------------------------|---------------|-----------------|--------------------|-----------------|-----------------|-----------------|---------------|-----------------|-----------------|-----------------|----------------------------------|-----------------|
|                            | mean<br>(SD)  | missing<br>%(n) | low<br>%(n)        | mid<br>%(n)     | high<br>%(n)    | missing<br>%(n) | mean<br>(SD)  | missing<br>%(n) | yes<br>%(n)     | missing<br>%(n) | mean<br>(SD)                     | missing<br>%(n) |
| KOALA<br>(Netherlands)     | 32.2<br>(3.8) | 0.1<br>(2)      | 8.8<br>(196)       | 36.5<br>(811)   | 54.1<br>(1,189) | 1.2<br>(26)     | 23.7<br>(3.9) | 0.5<br>(10)     | 85.5<br>(1,899) | 0<br>(0)        | 5.3<br>(4.3)                     | 0.0<br>(0)      |
| Lifeways<br>(Ireland)      | 31.6<br>(5.3) | 0.0<br>(0)      | 0.2<br>(1)         | 44.6<br>(244)   | 55.2<br>(302)   | 1.4<br>(8)      | 23.8<br>(3.9) | 15.1<br>(84)    | 54.4<br>(298)   | 1.3<br>(7)      | 3.1<br>(3.7)                     | 47.9<br>(266)   |
| LISA<br>(Germany)          | 31.4<br>(4.4) | 0.1<br>(2)      | 7.6<br>(187)       | 38.0<br>(936)   | 54.4<br>(1,340) | 1.2<br>(30)     | 22.6<br>(3.8) | 2.2<br>(54)     | 94.4<br>(2,329) | 1.1<br>(27)     | 4.8<br>(1.9)                     | 1.1<br>(28)     |
| LRC<br>(United Kingdom)    | 28.9<br>(5.2) | (0.1)<br>(4)    | 43.0<br>(1,130)    | 34.1<br>(898)   | 22.9<br>(602)   | 55.8<br>(3,318) | -<br>-        | -<br>-          | 62.0<br>(3,224) | 12.6<br>(751)   | 2.8<br>(3.0)                     | 12.6<br>(751)   |
| LucKi<br>(Netherlands)     | 30.8<br>(4.2) | 52.9<br>(438)   | 8.7<br>(41)        | 80.9<br>(382)   | 10.4<br>(49)    | 43.0<br>(356)   | 24.1<br>(4.4) | 67.5<br>(559)   | 62.3<br>(514)   | 0.4<br>(3)      | -<br>-                           | -<br>-          |
| PIAMA<br>(Netherlands)     | 30.5<br>(3.8) | 0.5<br>(17)     | 22.3<br>(795)      | 42.1<br>(1,500) | 35.6<br>(1,271) | 0.7<br>(25)     | 22.8<br>(3.4) | 9.3<br>(334)    | 82.6<br>(2,932) | 1.1<br>(40)     | 3.5<br>(3.5)                     | 1.1<br>(40)     |
| SEATON<br>(United Kingdom) | 30.8<br>(4.3) | 0.0<br>(0)      | 41.7<br>75         | 11.7<br>21      | 46.7<br>84      | 15.1<br>32      | -<br>-        | -<br>-          | 76.2<br>(157)   | 2.8<br>(6)      | 3.5<br>(3.8)                     | 3.8<br>(8)      |
| STEPS Study<br>(Finland)   | 31.3<br>(4.4) | 0.0<br>(0)      | 16.9<br>(138)      | 42.3<br>(345)   | 40.7<br>(332)   | 2.0<br>(17)     | 24.2<br>(4.7) | 1.8<br>(15)     | 98.5<br>(657)   | 19.8<br>(165)   | 9.3<br>(4.8)                     | 19.8<br>(165)   |
| SWS<br>(United Kingdom)    | 30.9<br>(3.8) | 0.0<br>(0)      | 38.8<br>(986)      | 32.1<br>(816)   | 29.1<br>(740)   | 0.3<br>(7)      | 25.2<br>(4.7) | 0.9<br>(24)     | 83.4<br>(2,042) | 4.0<br>(102)    | 4.3<br>(5.1)                     | 4.0<br>(102)    |
| WHISTLER<br>(Netherlands)  | 32.8<br>(3.5) | 9.8<br>(63)     | 32.2<br>(180)      | 0.0<br>(0)      | 67.8<br>(379)   | 13.3<br>(86)    | 24.8<br>(4.1) | 11.3<br>(73)    | 80.5<br>(503)   | 3.1<br>(20)     | 3.0<br>(2.9)                     | 4.5<br>(29)     |

The numbers shown are based on the inclusion criteria for this study (participants with information on physical activity and asthma for at least one age group). Cohort-specific details on study population and covariables can be found in the reference of the specific cohort.

\* CHOP study included participants in multiple countries: Belgium, Germany, Italy, Poland, and Spain.

**Table D. Longitudinal analyses on physical activity, sedentary behaviour and current asthma between age 6 and 18 years – exclusion of wheeze and asthma at baseline**

|                                        | n (n asthma cases) | n cohorts | aOR (95% CI) #      |
|----------------------------------------|--------------------|-----------|---------------------|
| <b>Questionnaire based</b>             |                    |           |                     |
| <i>Physical activity (hours/day)</i>   |                    |           |                     |
| age 3-5 years                          | 12972 (836)        | 10 a      | 1.00 (0.95 to 1.04) |
| <i>Sedentary behaviour (hours/day)</i> |                    |           |                     |
| age 3-5 years                          | 12595 (828)        | 9 b       | 1.04 (0.98 to 1.10) |
| <b>Accelerometry</b>                   |                    |           |                     |
| <i>Total activity (counts/min)</i>     |                    |           |                     |
| age 3-5 years                          | 732 (99)           | 2 c       | 1.00 (1.00 to 1.00) |
| <i>Sedentary activity</i>              |                    |           |                     |
| age 3-5 years                          | 732 (99)           | 2 c       | 1.04 (0.89 to 1.21) |
| <i>MVPA</i>                            |                    |           |                     |
| age 3-5 years                          | 732 (99)           | 2 c       | 1.00 (0.64 to 1.57) |

Generalized logistic mixed models on questionnaire based physical activity (PA) in hours per day, sedentary behaviour in hours per day, and accelerometry data at age 3-5 years; and current asthma at age 6-18 years. Subgroup analysis with exclusion of participants with wheeze or asthma at baseline.

# adjusted odds ratios (aOR) indicate the increase in odds of current asthma between age 6 and 18 years for each hour per day of parent reported physical activity or sedentary behaviour at the age of 3-5 years; and time in sedentary activity or moderate to vigorous physical activity (MVPA) recorded by accelerometry between age 3-5 years. Current asthma is defined as physician diagnosed asthma, ISAAC based current asthma definition or MeDALL based current asthma definition.

95% CI: 95% confidence intervals.

Multivariable analyses adjusted for sex, maternal education level, maternal BMI.

Included cohorts:

a: ABIS, G21, HUMIS, KOALA, Lifeways, LISA, LucKi, STEPS Study, SWS, Whistler

b: ABIS, G21, HUMIS, KOALA, Lifeways, LISA, LucKi, STEPS Study, SWS

c: KOALA, SWS

**Table E. Longitudinal analyses on physical activity, sedentary behaviour and ISAAC based definition of current asthma between age 6 and 18 years**

|                                        | n (n asthma cases) | n cohorts | aOR (95% CI) #      |
|----------------------------------------|--------------------|-----------|---------------------|
| <b>Questionnaire based</b>             |                    |           |                     |
| <i>Physical activity (hours/day)</i>   |                    |           |                     |
| age 0-2 years                          | 2024 (182)         | 2 a       | 0.92 (0.75 to 1.11) |
| age 3-5 years                          | 15968 (1256)       | 14 b      | 1.02 (0.98 to 1.06) |
| <i>Sedentary behaviour (hours/day)</i> |                    |           |                     |
| age 0-2 years                          | 2379 (205)         | 3 c       | 1.00 (0.72 to 1.38) |
| age 3-5 years                          | 16014 (1259)       | 13 d      | 1.03 (0.98 to 1.08) |
| <b>Accelerometry</b>                   |                    |           |                     |
| <i>Total activity (counts/min)</i>     |                    |           |                     |
| age 3-5 years                          | 775 (116)          | 2 e       | 1.00 (1.00 to 1.00) |
| <i>Sedentary activity</i>              |                    |           |                     |
| age 3-5 years                          | 775 (116)          | 2 e       | 1.03 (0.89 to 1.19) |
| <i>MVPA</i>                            |                    |           |                     |
| age 3-5 years                          | 775 (116)          | 2 e       | 0.94 (0.62 to 1.43) |

Generalized logistic mixed models on questionnaire based physical activity (PA) in hours per day, sedentary behaviour in hours per day, and accelerometry data at ages 0-2 years and 3-5 years; and ISAAC based definition of current asthma at age 6-18 years. ISAAC based current asthma is defined as (1) asthma ever and (2) dyspnea or wheeze in the last 12 months, or (3) regular use of asthma medication in the last 12 months.

# adjusted odds ratios (aOR) indicate the increase in odds of (ISAAC based) current asthma between age 6 and 18 years for each hour per day of parent reported physical activity or sedentary behaviour in the age periods between age 0-2 or 3-5 years; and time in sedentary activity or moderate to vigorous physical activity (MVPA) recorded by accelerometry between age 3-5 years.

95% CI: 95% confidence intervals.

Multivariable analyses adjusted for sex, maternal education level, maternal BMI.

Included cohorts:

a: KOALA, STEPS Study

b: ABCD, ABIS, Generation R, HUMIS, INMA Asturias, INMA Gipuzkoa, INMA Sabadell, INMA Valencia, KOALA, LISA, LucKi, STEPS Study, SWS, Whistler

c: HUMIS, KOALA, STEPS Study

d: ABCD, ABIS, Generation R, HUMIS, INMA Asturias, INMA Gipuzkoa, INMA Sabadell, INMA Valencia, KOALA, LISA, LucKi, STEPS Study, SWS

e: KOALA, SWS

**Table F. Longitudinal analyses on physical activity, sedentary behaviour and MeDALL based definition of current asthma between age 6 and 18 years**

|                                        | n (n asthma cases) | n cohorts |   | aOR (95% CI) #      |
|----------------------------------------|--------------------|-----------|---|---------------------|
| <b>Questionnaire based</b>             |                    |           |   |                     |
| <i>Physical activity (hours/day)</i>   |                    |           |   |                     |
| age 0-2 years                          | 1879 (171)         | 1         | a | 0.96 (0.79 to 1.18) |
| age 3-5 years                          | 15069 (1194)       | 12        | b | 1.01 (0.97 to 1.05) |
| <i>Sedentary behaviour (hours/day)</i> |                    |           |   |                     |
| age 0-2 years                          | 2264 (200)         | 2         | c | 1.00 (0.71 to 1.39) |
| age 3-5 years                          | 15225 (1200)       | 12        | b | 1.01 (0.95 to 1.06) |
| <b>Accelerometry</b>                   |                    |           |   |                     |
| <i>Total activity (counts/min)</i>     |                    |           |   |                     |
| age 3-5 years                          | 766 (71)           | 2         | d | 1.00 (1.00 to 1.00) |
| <i>Sedentary activity</i>              |                    |           |   |                     |
| age 3-5 years                          | 766 (71)           | 2         | d | 0.96 (0.79 to 1.17) |
| <i>MVPA</i>                            |                    |           |   |                     |
| age 3-5 years                          | 766 (71)           | 2         | d | 1.14 (0.67 to 1.94) |

Generalized logistic mixed models on questionnaire based physical activity (PA) in hours per day, sedentary behaviour in hours per day, and accelerometry data at ages 0-2 years and 3-5 years; and MeDALL based definition of current asthma at age 6-18 years. MeDALL based current asthma is defined as presence of 2 out of 3 criteria (1) asthma ever, (2) wheeze in the last 12 months, (3) use of asthma medication in the last 12 months.

# adjusted odds ratios (aOR) indicate the increase in odds of (MeDALL based) current asthma between age 6 and 18 years for each hour per day of parent reported physical activity or sedentary behaviour in the age periods between age 0-2 or 3-5 years; and time in sedentary activity or moderate to vigorous physical activity (MVPA) recorded by accelerometry between age 3-5 years.

95% CI: 95% confidence intervals.

Multivariable analyses adjusted for sex, maternal education level, maternal BMI.

Included cohorts:

a: KOALA

b: ABCD, ABIS, Generation R, HUMIS, INMA Asturias, INMA Gipuzkoa, INMA Sabadell, INMA Valencia, KOALA, LISA, LucKi, SWS

c: HUMIS, KOALA

d: KOALA, SWS



**Table G. Longitudinal analyses on physical activity and sedentary behaviour in tertiles and current asthma at age 6-18 years (multivariable)**

| Physical activity in tertiles          | n (n cases asthma) | n cohort |   | Low tertile aOR (95% CI) | Mid tertile aOR (95% CI) | High tertile aOR (95% CI) |
|----------------------------------------|--------------------|----------|---|--------------------------|--------------------------|---------------------------|
| age 0-2 years                          | 64658 (6086)       | 3        | a | ref                      | 0.69 (0.59 to 0.82)      | 0.80 (0.68 to 0.95)       |
| age 3-5 years                          | 24912 (2681)       | 17       | b | ref                      | 1.03 (0.93 to 1.14)      | 1.10 (0.99 to 1.22)       |
| <b>Sedentary behaviour in tertiles</b> |                    |          |   |                          |                          |                           |
| age 0-2 years                          | 2380 (329)         | 3        | c | ref                      | 0.99 (0.77 to 1.27)      | 1.28 (0.88 to 1.87)       |
| age 3-5 years                          | 22449 (2515)       | 15       | d | ref                      | 0.94 (0.85 to 1.05)      | 0.99 (0.89 to 1.11)       |

Generalized logistic mixed models on physical activity in tertiles and sedentary behaviour in tertiles at ages 0-2 years and 3-5 years; and current asthma at age 6-18 years. Current asthma is defined as physician diagnosed asthma, ISAAC based current asthma definition or MeDALL based current asthma definition.

aOR adjusted Odds Ratio; 95% CI 95% confidence interval.

Multivariable analyses adjusted for sex, maternal education level, maternal BMI.

Included cohorts:

a: DNBC, KOALA, STEPS Study

b: ABCD, ABIS, G21, Gen R, HUMIS, INMA Asturias, INMA Gipuzkoa, INMA Sabadell, INMA Valencia, KOALA, Lifeways, LISA, LucKi, PIAMA, STEPS Study, SWS, WHISTLER

c: HUMIS, KOALA, STEPS Study

d: ABCD, ABIS, G21, Gen R, HUMIS, INMA Asturias, INMA Gipuzkoa, INMA Sabadell, INMA Valencia, KOALA, Lifeways, LucKi, PIAMA, STEPS Study, SWS

**Table H. Longitudinal analyses on physical activity and sedentary behaviour in tertiles and current asthma at age 6-18 years (univariable)**

| Physical activity in tertiles          | n (n cases asthma) | n cohort |   | Low tertile OR (95% CI) | Mid tertile OR (95% CI) | High tertile OR (95% CI) |
|----------------------------------------|--------------------|----------|---|-------------------------|-------------------------|--------------------------|
| age 0-2 years                          | 68482 (6451)       | 4        | a | ref                     | 0.71 (0.56 to 0.89)     | 0.82 (0.65 to 1.04)      |
| age 3-5 years                          | 30109 (3739)       | 18       | b | ref                     | 1.06 (0.97 to 1.16)     | 1.17 (1.07 to 1.28)      |
| <b>Sedentary behaviour in tertiles</b> |                    |          |   |                         |                         |                          |
| age 0-2 years                          | 2467 (338)         | 4        | c | ref                     | 1.07 (0.83 to 1.37)     | 1.36 (0.95 to 1.95)      |
| age 3-5 years                          | 27661 (3629)       | 17       | d | ref                     | 1.03 (0.95 to 1.12)     | 1.11 (1.00 to 1.22)      |

Generalized logistic mixed models on physical activity in tertiles and sedentary behaviour in tertiles at ages 0-2 years and 3-5 years; and current asthma at age 6-18 years. Current asthma is defined as physician diagnosed asthma, ISAAC based current asthma definition or MeDALL based current asthma definition.

OR Odds Ratio; 95% CI 95% confidence interval

Univariable analyses.

Included cohorts:

a: DNBC, KOALA, LRC, STEPS Study

b: ABCD, ABIS, G21, Gen R, HUMIS, INMA Asturias, INMA Gipuzkoa, INMA Sabadell, INMA Valencia, KOALA, Lifeways, LISA, LRC, LucKi, PIAMA, STEPS Study, SWS, WHISTLER

c: HUMIS, KOALA, LRC, STEPS Study

d: ABCD, ABIS, COPSAC<sub>2000</sub>, G21, Gen R, HUMIS, INMA Asturias, INMA Gipuzkoa, INMA Sabadell, INMA Valencia, KOALA, Lifeways, LRC, LucKi, PIAMA, STEPS Study, SWS

**Figure A. Meta-analysis of longitudinal data on sedentary behaviour measured with accelerometry and current asthma at age 6-18 years**

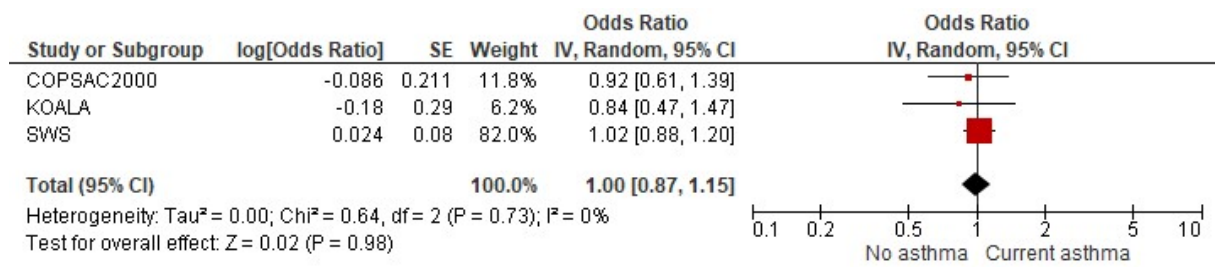

Meta-analysis of longitudinal data on sedentary behaviour measured with accelerometry and current asthma at age 6-18 years. Meta-analysis of cohort-specific logistic regression analyses. Current asthma is defined as physician diagnosed asthma, ISAAC based current asthma definition or MeDALL based current asthma definition.

95% CI 95% confidence interval

Multivariable analyses adjusted for sex, maternal education level, maternal BMI (maternal BMI available for KOALA and SWS, not available for COPSAC<sub>2000</sub>).

**Table I. Longitudinal age-specific analyses on physical activity in hours/day and sedentary behaviour in hours/day and current asthma (multivariable)**

| Age at exposure                  | Age at outcome     | Current asthma |              |   |                     |
|----------------------------------|--------------------|----------------|--------------|---|---------------------|
| Physical activity in hours/day   | n (n cases asthma) | n cohort       | aOR (95% CI) |   |                     |
| age 0-2 years                    | age 3-5 years      | 2735 (295)     | 3            | a | 1.01 (0.85 to 1.20) |
| age 0-2 years                    | age 6-8 years      | 1918 (218)     | 2            | b | 0.89 (0.74 to 1.07) |
| age 3-5 years                    | age 6-8 years      | 21155 (1875)   | 15           | c | 1.01 (0.97 to 1.04) |
| age 6-8 years                    | age 9-14 years     | 58324 (2731)   | 6            | d | 1.00 (0.97 to 1.03) |
| age 9-14 years                   | age 15-18 years    | 3311 (201)     | 3            | e | 0.90 (0.77 to 1.05) |
| Sedentary behaviour in hours/day |                    |                |              |   |                     |
| age 0-2 years                    | age 3-5 years      | 3287 (316)     | 4            | f | 1.19 (0.89 to 1.58) |
| age 0-2 years                    | age 6-8 years      | 2269 (263)     | 3            | g | 0.93 (0.69 to 1.25) |
| age 3-5 years                    | age 6-8 years      | 20856 (1852)   | 14           | h | 1.02 (0.98 to 1.06) |
| age 6-8 years                    | age 9-14 years     | 59337 (2827)   | 7            | i | 1.02 (0.98 to 1.05) |
| age 9-14 years                   | age 15-18 years    | 5482 (436)     | 4            | j | 1.01 (0.92 to 1.11) |

Generalized logistic mixed models on physical activity in hours/day and sedentary in hours/day and subsequent current asthma for each age group. Current asthma is defined as physician diagnosed asthma, ISAAC based current asthma definition or MeDALL based current asthma definition.

aOR adjusted Odds Ratio; 95% CI 95% confidence interval.

Multivariable analyses adjusted for sex, maternal education level, maternal BMI.

Included cohorts:

a: EDEN, KOALA, STEPS Study

b: KOALA, STEPS Study

c: ABCD, ABIS, G21, Gen R, HUMIS, INMA Asturias, INMA Gipuzkoa, INMA Sabadell, INMA Valencia, KOALA, LISA, LucKi, STEPS Study, SWS, Whistler

d: DNBC, Gen R, GINIplus, INMA Menorca, KOALA, LISA

e: GINIplus, INMA Menorca, LISA

f: EDEN, HUMIS, KOALA, STEPS Study

g: HUMIS, KOALA, STEPS Study

h: ABCD, ABIS, G21, Gen R, HUMIS, INMA Asturias, INMA Gipuzkoa, INMA Sabadell, INMA Valencia, KOALA, LISA, LucKi, STEPS Study, SWS

i: CHOP, DNBC, GenR, GINIplus, INMA Menorca, KOALA, LISA

j: GINIplus, INMA Menorca, LISA, PIAMA

**Table J. Longitudinal age-specific analyses on physical activity in hours/day and sedentary behaviour in hours/day and current asthma (univariable)**

| <b>Age at exposure</b>                  | <b>Age at outcome</b>     | <b>Current asthma</b> |      |                     |
|-----------------------------------------|---------------------------|-----------------------|------|---------------------|
| <b>Physical activity in hours/day</b>   | <b>n (n cases asthma)</b> | <b>n cohort</b>       |      | <b>OR (95% CI)</b>  |
| age 0-2 years                           | age 3-5 years             | 2792 (299)            | 4 a  | 1.05 (0.88 to 1.25) |
| age 0-2 years                           | age 6-8 years             | 1965 (223)            | 3 b  | 0.92 (0.75 to 1.13) |
| age 3-5 years                           | age 6-8 years             | 25463 (2585)          | 16 c | 1.02 (0.99 to 1.05) |
| age 6-8 years                           | age 9-14 years            | 65888 (3741)          | 7 d  | 1.00 (0.98 to 1.03) |
| age 9-14 years                          | age 15-18 years           | 6934 (828)            | 5 e  | 1.02 (0.92 to 1.13) |
| <b>Sedentary behaviour in hours/day</b> |                           |                       |      |                     |
| age 0-2 years                           | age 3-5 years             | 3440 (325)            | 5 f  | 1.30 (0.99 to 1.71) |
| age 0-2 years                           | age 6-8 years             | 2354 (268)            | 4 g  | 1.08 (0.83 to 1.42) |
| age 3-5 years                           | age 6-8 years             | 25116 (2554)          | 15 h | 1.05 (1.01 to 1.09) |
| age 6-8 years                           | age 9-14 years            | 66965 (3825)          | 8 i  | 1.03 (0.99 to 1.07) |
| age 9-14 years                          | age 15-18 years           | 9311 (1078)           | 6 j  | 1.01 (0.97 to 1.05) |

Generalized logistic mixed models on physical activity in hours/day and sedentary in hours/day and subsequent current asthma for each age group. Current asthma is defined as physician diagnosed asthma, ISAAC based current asthma definition or MeDALL based current asthma definition.

OR Odds Ratio; 95% CI 95% confidence interval

Univariable analyses.

Included cohorts:

a: EDEN, KOALA, LRC, STEPS Study

b: KOALA, LRC, STEPS Study

c: ABCD, ABIS, G21, Gen R, HUMIS, INMA Asturias, INMA Gipuzkoa, INMA Sabadell, INMA Valencia, KOALA, LISA, LRC, LucKi, STEPS Study, SWS, WHISTLER

d: DNBC, Gen R, GINIplus, INMA Menorca, KOALA, LISA, LRC

e: BAMSE, GINIplus, INMA Menorca, LISA, LRC

f: EDEN, HUMIS, KOALA, LRC, STEPS Study

g: HUMIS, KOALA, LRC, STEPS Study

h: ABCD, ABIS, G21, Gen R, HUMIS, INMA Asturias, INMA Gipuzkoa, INMA Sabadell, INMA Valencia, KOALA, LISA, LRC, LucKi, STEPS Study, SWS

i: CHOP, DNBC, Gen R, GINIplus, INMA Menorca, KOALA, LISA, LRC

j: BAMSE, GINIplus, INMA Menorca, LISA, LRC, PIAMA

**Table K. Longitudinal age-specific analyses on physical activity in tertiles and current asthma (multivariable)**

| Age at exposure                        | Age at outcome  | Current asthma     |          |   |                          |                          |                           |
|----------------------------------------|-----------------|--------------------|----------|---|--------------------------|--------------------------|---------------------------|
|                                        |                 | n (n cases asthma) | n cohort |   | Low tertile aOR (95% CI) | Mid tertile aOR (95% CI) | High tertile aOR (95% CI) |
| <b>Physical activity in tertiles</b>   |                 |                    |          |   |                          |                          |                           |
| age 0-2 years                          | age 3-5 years   | 2735 (295)         | 3        | a | ref                      | 1.05 (0.78 to 1.40)      | 1.17 (0.84 to 1.64)       |
| age 0-2 years                          | age 6-8 years   | 42788 (4948)       | 3        | b | ref                      | 0.64 (0.54 to 0.77)      | 0.75 (0.62 to 0.91)       |
| age 3-5 years                          | age 6-8 years   | 24061 (2212)       | 16       | c | ref                      | 1.01 (0.90 to 1.13)      | 1.07 (0.95 to 1.20)       |
| age 6-8 years                          | age 9-14 years  | 61102 (3057)       | 8        | d | ref                      | 0.93 (0.86 to 1.02)      | 1.03 (0.94 to 1.13)       |
| age 9-14 years                         | age 15-18 years | 4929 (406)         | 4        | e | ref                      | 0.87 (0.69 to 1.11)      | 0.83 (0.64 to 1.09)       |
| <b>Sedentary behaviour in tertiles</b> |                 |                    |          |   |                          |                          |                           |
| age 0-2 years                          | age 3-5 years   | 3287 (316)         | 4        | f | ref                      | 1.18 (0.91 to 1.53)      | 1.42 (0.98 to 2.06)       |
| age 0-2 years                          | age 6-8 years   | 2269 (263)         | 3        | g | ref                      | 1.00 (0.76 to 1.32)      | 1.09 (0.71 to 1.67)       |
| age 3-5 years                          | age 6-8 years   | 21675 (2121)       | 14       | h | ref                      | 0.91 (0.82 to 1.02)      | 0.97 (0.86 to 1.10)       |
| age 6-8 years                          | age 9-14 years  | 61667 (3112)       | 8        | i | ref                      | 0.98 (0.90 to 1.08)      | 1.06 (0.97 to 1.16)       |
| age 9-14 years                         | age 15-18 years | 5482 (436)         | 4        | j | ref                      | 0.94 (0.74 to 1.20)      | 0.97 (0.76 to 1.24)       |

Generalized logistic mixed models on physical activity in tertiles and sedentary in tertiles and subsequent current asthma for each age group. Current asthma is defined as physician diagnosed asthma, ISAAC based current asthma definition or MeDALL based current asthma definition.

aOR adjusted Odds Ratio; 95% CI 95% confidence interval.

Multivariable analyses adjusted for sex, maternal education level, maternal BMI.

Included cohorts:

a: EDEN, KOALA, STEPS Study

b: DNBC, KOALA, STEPS Study

c: ABCD, ABIS, G21, Gen R, HUMIS, INMA Asturias, INMA Gipuzkoa, INMA Sabadell, INMA Valencia, KOALA, LISA, LucKi, PIAMA, STEPS Study, SWS, WHISTLER

d: CHOP, DNBC, Gen R, GINIplus, INMA Menorca, KOALA, LISA, PIAMA

e: GINIplus, INMA Menorca, LISA, PIAMA

f: EDEN, HUMIS, KOALA, STEPS Study

g: HUMIS, KOALA, STEPS Study

h: ABCD, ABIS, G21, Gen R, HUMIS, INMA Asturias, INMA Gipuzkoa, INMA Sabadell, INMA Valencia, KOALA, LucKi, PIAMA, STEPS Study, SWS

i: CHOP, DNBC, Gen R, GINIplus, INMA Menorca, KOALA, LISA, PIAMA

j: GINIplus, INMA Menorca, LISA, PIAMA

**Table L Longitudinal age-specific analyses on physical activity in tertiles and current asthma (univariable)**

| Age at exposure                        | Age at outcome  | n (n cases asthma) | Current asthma |                         |                         |                          |
|----------------------------------------|-----------------|--------------------|----------------|-------------------------|-------------------------|--------------------------|
|                                        |                 |                    | n cohort       | Low tertile OR (95% CI) | Mid tertile OR (95% CI) | High tertile OR (95% CI) |
| <b>Physical activity in tertiles</b>   |                 |                    |                |                         |                         |                          |
| age 0-2 years                          | age 3-5 years   | 2792 (299)         | 4 a            | ref                     | 1.05 (0.81 to 1.37)     | 1.20 (0.97 to 1.76)      |
| age 0-2 years                          | age 6-8 years   | 45159 (5254)       | 4 b            | ref                     | 0.65 (0.51 to 0.82)     | 0.76 (0.60 to 0.97)      |
| age 3-5 years                          | age 6-8 years   | 28630 (2958)       | 17 c           | ref                     | 1.01 (0.91 to 1.12)     | 1.13 (1.02 to 1.25)      |
| age 6-8 years                          | age 9-14 years  | 68858 (4093)       | 9 d            | ref                     | 0.94 (0.87 to 1.02)     | 1.05 (0.97 to 1.14)      |
| age 9-14 years                         | age 15-18 years | 8818 (1078)        | 7 e            | ref                     | 1.00 (0.85 to 1.17)     | 1.09 (0.93 to 1.28)      |
| <b>Sedentary behaviour in tertiles</b> |                 |                    |                |                         |                         |                          |
| age 0-2 years                          | age 3-5 years   | 3440 (325)         | 5 f            | ref                     | 1.25 (0.98 to 1.61)     | 1.62 (1.13 to 2.31)      |
| age 0-2 years                          | age 6-8 years   | 2354 (268)         | 4 g            | ref                     | 1.07 (0.80 to 1.43)     | 1.26 (0.81 to 1.97)      |
| age 3-5 years                          | age 6-8 years   | 26276 (2862)       | 16 h           | ref                     | 1.00 (0.91 to 1.09)     | 1.10 (0.99 to 1.22)      |
| age 6-8 years                          | age 9-14 years  | 69504 (4138)       | 10 i           | ref                     | 0.97 (0.89 to 1.06)     | 1.10 (1.01 to 1.20)      |
| age 9-14 years                         | age 15-18 years | 9311 (1078)        | 6 j            | ref                     | 1.12 (0.96 to 1.32)     | 1.00 (0.86 to 1.18)      |

Generalized logistic mixed models on physical activity in tertiles and sedentary in tertiles and subsequent current asthma for each age group. Current asthma is defined as physician diagnosed asthma, ISAAC based current asthma definition or MeDALL based current asthma definition.

OR Odds Ratio; 95% CI 95% confidence interval.

Univariable analyses.

Included cohorts:

a: EDEN, KOALA, LRC, STEPS Study

b: DNBC, KOALA, LRC, STEPS Study

c: ABCD, ABIS, G21, Gen R, HUMIS, INMA Asturias, INMA Gipuzkoa, INMA Sabadell, INMA Valencia, KOALA, LISA, LRC, LucKi, PIAMA, STEPS Study, SWS, WHISTLER

d: CHOP, DNBC, Gen R, GINIplus, INMA Menorca, KOALA, LISA, LRC, PIAMA

e: BAMSE, GINIplus, INMA Menorca, LISA, LRC, PIAMA, SEATON

f: EDEN, HUMIS, KOALA, LRC, STEPS Study

g: HUMIS, KOALA, LRC, STEPS Study

h: ABCD, ABIS, COPSAC<sub>2000</sub>, G21, Gen R, HUMIS, INMA Asturias, INMA Gipuzkoa, INMA Sabadell, INMA Valencia, KOALA, LRC, LucKi, PIAMA, STEPS Study, SWS

i: CHOP, COPSAC<sub>2000</sub>, DNBC, Gen R, GINIplus, INMA Menorca, KOALA, LISA, LRC, PIAMA

j: BAMSE, GINIplus, INMA Menorca, LISA, LRC, PIAMA

**Table M. Longitudinal analyses on physical activity in hours/day and sedentary behaviour in hours/day and current asthma between age 6 and 18 years – interaction with BMI at baseline and physical activity and sedentary behaviour (multivariable)**

|                                 | <b>n (n asthma cases)</b> | <b>n cohorts</b> |   | <b>aOR (95% CI) #</b> |
|---------------------------------|---------------------------|------------------|---|-----------------------|
| <b>Age 0-2 years</b>            |                           |                  |   |                       |
| Physical activity (hours/day)   | 1852 (257)                | 2                | a | 0.89 (0.76 to 1.05)   |
| BMI at baseline                 |                           |                  |   | 1.14 (0.91 to 1.43)   |
| BMI*PA                          |                           |                  |   | 1.01 (0.87 to 1.19)   |
| Sedentary behaviour (hours/day) | 2185 (301)                | 3                | b | 1.05 (0.79 to 1.38)   |
| BMI at baseline                 |                           |                  |   | 1.06 (0.89 to 1.27)   |
| BMI*Sed                         |                           |                  |   | 1.21 (0.94 to 1.54)   |
| <b>Age 3-5 years</b>            |                           |                  |   |                       |
| Physical activity (hours/day)   | 14715 (1468)              | 14               | c | 1.03 (0.99 to 1.09)   |
| BMI at baseline                 |                           |                  |   | 1.10 (0.99 to 1.22)   |
| BMI*PA                          |                           |                  |   | 1.01 (0.97 to 1.05)   |
| Sedentary behaviour (hours/day) | 14755 (1474)              | 13               | d | 1.05 (1.00 to 1.10)   |
| BMI at baseline                 |                           |                  |   | 1.16 (1.07 to 1.27)   |
| BMI*Sed                         |                           |                  |   | 0.99 (0.96 to 1.02)   |

Generalized logistic mixed models on questionnaire based physical activity (PA) in hours per day and sedentary behaviour in hours per day at ages 0-2 years and 3-5 years; and current asthma at age 6-18 years.

# Adjusted odds ratios (aOR) indicate the increase in odds of current asthma between age 6 and 18 years for physical activity and sedentary behaviour, but also for BMI at baseline, and the interaction terms BMI\*PA and BMI\*Sed, which reflect the interaction of BMI at baseline (i.e. at age 0-2 years or 3-5 years) and physical activity (PA) or sedentary behaviour (Sed). Current asthma is defined as physician diagnosed asthma, ISAAC based current asthma definition or MeDALL based current asthma definition.

95% CI: 95% confidence intervals

Multivariable analyses adjusted for sex, maternal education level, maternal BMI.

Included cohorts:

a: KOALA, STEPS Study

b: HUMIS, KOALA, STEPS Study

c: ABCD, G21, HUMIS, INMA Asturias, INMA Gipuzkoa, INMA Sabadell, INMA Valencia, KOALA, Lifeways, LISA, LucKi, STEPS Study, SWS, Whistler

d: ABCD, G21, HUMIS, INMA Asturias, INMA Gipuzkoa, INMA Sabadell, INMA Valencia, KOALA, Lifeways, LISA, LucKi, STEPS Study, SWS

**Table N. Longitudinal analyses on physical activity in hours/day and sedentary behaviour in hours/day and current asthma between age 6 and 18 years – interaction with BMI at baseline and physical activity and sedentary behaviour (univariable)**

| <b>Age at exposure</b>          | <b>n (n asthma cases)</b> | <b>n cohorts</b> | <b>OR (95% CI) #</b> |
|---------------------------------|---------------------------|------------------|----------------------|
| <b>Age 0-2 years</b>            |                           |                  |                      |
| Physical activity (hours/day)   | 1882 (261)                | 2 a              | 0.89 (0.76 to 1.05)  |
| BMI at baseline                 |                           |                  | 1.14 (0.91 to 1.43)  |
| BMI*PA                          |                           |                  | 1.01 (0.87 to 1.19)  |
| Sedentary behaviour (hours/day) | 2216 (305)                | 3 b              | 1.05 (0.79 to 1.38)  |
| BMI at baseline                 |                           |                  | 1.06 (0.89 to 1.27)  |
| BMI*Sed                         |                           |                  | 1.21 (0.94 to 1.54)  |
| <b>Age 3-5 years</b>            |                           |                  |                      |
| Physical activity (hours/day)   | 15566 (1546)              | 14 c             | 1.03 (0.99 to 1.09)  |
| BMI at baseline                 |                           |                  | 1.10 (0.99 to 1.22)  |
| BMI*PA                          |                           |                  | 1.01 (0.97 to 1.05)  |
| Sedentary behaviour (hours/day) | 15621 (1553)              | 13 d             | 1.05 (1.00 to 1.10)  |
| BMI at baseline                 |                           |                  | 1.16 (1.07 to 1.27)  |
| BMI*Sed                         |                           |                  | 0.99 (0.96 to 1.02)  |

Generalized logistic mixed models on questionnaire based physical activity (PA) in hours per day and sedentary behaviour in hours per day at ages 0-2 years and 3-5 years; and current asthma at age 6-18 years.

# Odds ratios (OR) indicate the increase in odds of current asthma between age 6 and 18 years for physical activity and sedentary behaviour, but also for BMI at baseline, and the interaction terms BMI\*PA and BMI\*Sed, which reflect the interaction of BMI at baseline (i.e. at age 0-2 years or 3-5 years) and physical activity (PA) or sedentary behaviour (Sed). Current asthma is defined as physician diagnosed asthma, ISAAC based current asthma definition or MeDALL based current asthma definition.

95% CI: 95% confidence intervals

Univariable analyses.

Included cohorts:

a: KOALA, STEPS Study

b: HUMIS, KOALA, STEPS Study

c: ABCD, G21, HUMIS, INMA Asturias, INMA Gipuzkoa, INMA Sabadell, INMA Valencia, KOALA, Lifeways, LISA, LucKi, STEPS Study, SWS, Whistler

d: ABCD, G21, HUMIS, INMA Asturias, INMA Gipuzkoa, INMA Sabadell, INMA Valencia, KOALA, Lifeways, LISA, LucKi, STEPS Study, SWS



**Table O. Longitudinal age-specific analyses on physical activity in hours/day and sedentary behaviour in hours/day and lung function**

| Age at exposure                         | Age at outcome  | FEV <sub>1</sub> |          |              |                       | FEV <sub>1</sub> /FVC |          |              |                       |
|-----------------------------------------|-----------------|------------------|----------|--------------|-----------------------|-----------------------|----------|--------------|-----------------------|
|                                         |                 | n                | n cohort | B (95% CI) # | #                     | n                     | n cohort | B (95% CI) # | #                     |
| <b>Physical activity in hours/day</b>   |                 |                  |          |              |                       |                       |          |              |                       |
| age 0-2 years                           | age 3-5 years   | 733              | 1        | a            | 0.19 (-0.40 to 0.78)  | 738                   | 1        | a            | -0.38 (-0.82 to 0.08) |
| age 0-2 years                           | age 6-8 years   | 487              | 1        | b            | 0.09 (-0.02 to 0.20)  | 488                   | 1        | b            | -0.01 (-0.12 to 0.09) |
| age 3-5 years                           | age 6-8 years   | 4008             | 8        | c            | -0.01 (-0.03 to 0.02) | 3967                  | 7        | h            | -0.01 (-0.04 to 0.01) |
| age 6-8 years                           | age 9-14 years  | 3716             | 4        | d            | -0.02 (-0.05 to 0.01) | 3672                  | 4        | d            | -0.03 (-0.06 to 0.00) |
| age 9-14 years                          | age 15-18 years | 2052             | 3        | e            | -0.02 (-0.06 to 0.02) | 2052                  | 3        | e            | -0.03 (-0.07 to 0.01) |
| <b>Sedentary behaviour in hours/day</b> |                 |                  |          |              |                       |                       |          |              |                       |
| age 0-2 years                           | age 3-5 years   | 715              | 1        | b            | -0.20 (-1.16 to 0.76) | 720                   | 1        | b            | -0.03 (-0.76 to 0.69) |
| age 0-2 years                           | age 6-8 years   | 507              | 1        | b            | 0.04 (-0.16 to 0.23)  | 508                   | 1        | b            | -0.06 (-0.24 to 0.12) |
| age 3-5 years                           | age 6-8 years   | 3959             | 7        | f            | -0.02 (-0.04 to 0.01) | 3919                  | 6        | i            | -0.02 (-0.04 to 0.01) |
| age 6-8 years                           | age 9-14 years  | 4156             | 4        | d            | 0.03 (0.00 to 0.06)   | 4113                  | 4        | d            | 0.01 (-0.02 to 0.04)  |
| age 9-14 years                          | age 15-18 years | 3013             | 4        | g            | 0.01 (-0.03 to 0.05)  | 3014                  | 4        | g            | 0.04 (0.00 to 0.07)   |

Generalized linear mixed models on physical activity in hours/day, sedentary behaviour in hours/day, and lung function. FEV<sub>1</sub> forced expiratory volume in 1 second (in z-score); FVC: forced vital capacity; B Beta; 95% CI 95% confidence interval. # Beta (B) indicates the increase of FEV<sub>1</sub> z-score in SDS at age at outcome for each hour per day of parent reported physical activity or sedentary behaviour at age at exposure. 95% CI: 95% confidence intervals.

Multivariable analyses adjusted for sex, maternal education level, maternal BMI

Included cohorts:

a: EDEN

b: KOALA

c: G21, INMA Gipuzkoa, INMA Sabadell, INMA Valencia, KOALA, LISA, SWS, WHISTLER

d: Gen R, GINIplus, INMA Menorca, LISA

e: GINIplus, INMA Menorca, LISA

f: G21, INMA Gipuzkoa, INMA Sabadell, INMA Valencia, KOALA, LISA, SWS

g: GINIplus, INMA Menorca, LISA, PIAMA

h: G21, INMA Gipuzkoa, INMA Sabadell, INMA Valencia, KOALA, SWS, WHISTLER

i: G21, INMA Gipuzkoa, INMA Sabadell, INMA Valencia, KOALA, SWS

**Table P. Longitudinal age-specific analyses on physical activity in hours/day and sedentary behaviour in hours/day and lung function – exclusion of wheeze and asthma at baseline**

| Age at exposure                         | Age at outcome  | FEV <sub>1</sub> |          |            |                       | FEV <sub>1</sub> /FVC |          |            |                       |
|-----------------------------------------|-----------------|------------------|----------|------------|-----------------------|-----------------------|----------|------------|-----------------------|
|                                         |                 | n                | n cohort | B (95% CI) | #                     | n                     | n cohort | B (95% CI) | #                     |
| <b>Physical activity in hours/day</b>   |                 |                  |          |            |                       |                       |          |            |                       |
| age 0-2 years                           | age 3-5 years   | 618              | 1        | a          | 0.07 (-0.57 to 0.71)  | 623                   | 1        | a          | -0.43 (-0.93 to 0.07) |
| age 0-2 years                           | age 6-8 years   | 412              | 1        | b          | 0.09 (-0.03 to 0.21)  | 413                   | 1        | b          | -0.05 (-0.15 to 0.06) |
| age 3-5 years                           | age 6-8 years   | 3177             | 8        | c          | 0.00 (-0.02 to 0.03)  | 3144                  | 7        | h          | -0.01 (-0.04 to 0.01) |
| age 6-8 years                           | age 9-14 years  | 3014             | 4        | d          | -0.02 (-0.04 to 0.01) | 2971                  | 4        | d          | -0.01 (-0.04 to 0.02) |
| age 9-14 years                          | age 15-18 years | 1809             | 3        | e          | -0.03 (-0.07 to 0.01) | 1809                  | 3        | e          | -0.03 (-0.07 to 0.01) |
| <b>Sedentary behaviour in hours/day</b> |                 |                  |          |            |                       |                       |          |            |                       |
| age 0-2 years                           | age 3-5 years   | 602              | 1        | b          | -0.10 (-1.12 to 0.93) | 607                   | 1        | b          | 0.02 (-0.78 to 0.83)  |
| age 0-2 years                           | age 6-8 years   | 426              | 1        | b          | 0.07 (-0.13 to 0.27)  | 427                   | 1        | b          | -0.07 (-0.25 to 0.12) |
| age 3-5 years                           | age 6-8 years   | 3127             | 7        | f          | -0.02 (-0.05 to 0.01) | 3095                  | 6        | i          | -0.02 (-0.05 to 0.01) |
| age 6-8 years                           | age 9-14 years  | 3373             | 4        | d          | 0.03 (0.00 to 0.06)   | 3331                  | 4        | d          | 0.01 (-0.02 to 0.04)  |
| age 9-14 years                          | age 15-18 years | 2626             | 4        | g          | 0.01 (-0.03 to 0.04)  | 2627                  | 4        | g          | 0.03 (-0.00 to 0.07)  |

Generalized linear mixed models on physical activity in hours/day, sedentary behaviour in hours/day, and lung function.

Subgroup analysis with exclusion of participants with wheeze or asthma at baseline.

FEV<sub>1</sub> forced expiratory volume in 1 second (in z-score); FVC: forced vital capacity; B Beta; 95% CI 95% confidence interval.

# Beta (B) indicates the increase of FEV<sub>1</sub> z-score in SDS at age at outcome for each hour per day of parent reported physical activity or sedentary behaviour at age at exposure.

95% CI: 95% confidence intervals.

Multivariable analyses adjusted for sex, maternal education level, maternal BMI

Included cohorts:

a: EDEN

b: KOALA

c: G21, INMA Gipuzkoa, INMA Sabadell, INMA Valencia, KOALA, LISA, SWS, WHISTLER

d: Gen R, GINIplus, INMA Menorca, LISA

e: GINIplus, INMA Menorca, LISA

f: G21, INMA Gipuzkoa, INMA Sabadell, INMA Valencia, KOALA, LISA, SWS

g: GINIplus, INMA Menorca, LISA, PIAMA

h: G21, INMA Gipuzkoa, INMA Sabadell, INMA Valencia, KOALA, SWS, WHISTLER

i: G21, INMA Gipuzkoa, INMA Sabadell, INMA Valencia, KOALA, SWS

**Table Q. Longitudinal age-specific analyses on physical activity measured with accelerometry and lung function**

| Age at exposure                    | Age at outcome | FEV <sub>1</sub> |          |   |                        | FEV <sub>1</sub> /FVC |          |   |                       |
|------------------------------------|----------------|------------------|----------|---|------------------------|-----------------------|----------|---|-----------------------|
|                                    |                | n                | n cohort | a | B (95% CI) #           | n                     | n cohort | a | B (95% CI) #          |
| <b>Accelerometry in counts/min</b> |                |                  |          |   |                        |                       |          |   |                       |
| age 3-5 years                      | age 6-8 years  | 361              | 2        | a | 0.00 (-0.00 to 0.00)   | 359                   | 2        | a | 0.00 (-0.00 to 0.00)  |
| <b>Sedentary level (hours/day)</b> |                |                  |          |   |                        |                       |          |   |                       |
| age 3-5 years                      | age 6-8 years  | 361              | 2        | a | -0.13 (-0.20 to -0.06) | 359                   | 2        | a | 0.01 (-0.05 to 0.08)  |
| <b>MVPA (hours/day)</b>            |                |                  |          |   |                        |                       |          |   |                       |
| age 3-5 years                      | age 6-8 years  | 361              | 2        | a | 0.27 (0.07 to 0.46)    | 359                   | 2        | a | -0.06 (-0.25 to 0.14) |

Generalized linear mixed models on accelerometry data in counts per minute (counts/min), time in sedentary activity or moderate to vigorous physical activity (MVPA) recorded by accelerometry between age 3-5 years, and lung function. Age specific analyses: no data available at other age groups (0-2, 6-8, 9-14, 15-18 years). FEV<sub>1</sub> forced expiratory volume in 1 second (in z-score); FVC: forced vital capacity; B Beta; 95% CI 95% confidence interval. # Beta (B) indicates the increase of FEV<sub>1</sub> z-score in SDS at age at outcome for each hour per day of measured time in sedentary activity or moderate to vigorous physical activity (MVPA) recorded by accelerometry at age at exposure. Multivariable analyses adjusted for sex, maternal education level, maternal BMI.

Included cohorts:  
a: KOALA, SWS

**Table R. Longitudinal age-specific analyses on physical activity measured with accelerometry and lung function – exclusion of wheeze and asthma at baseline**

| Age at exposure                    | Age at outcome | FEV <sub>1</sub> |          |   |                        | FEV <sub>1</sub> /FVC |          |   |                       |
|------------------------------------|----------------|------------------|----------|---|------------------------|-----------------------|----------|---|-----------------------|
|                                    |                | n                | n cohort | a | B (95% CI) #           | n                     | n cohort | a | B (95% CI) #          |
| <b>Accelerometry in counts/min</b> |                |                  |          |   |                        |                       |          |   |                       |
| age 3-5 years                      | age 6-8 years  | 296              | 2        | a | 0.00 (-0.00 to 0.00)   | 259                   | 2        | a | -0.00 (-0.00 to 0.00) |
| <b>Sedentary level (hours/day)</b> |                |                  |          |   |                        |                       |          |   |                       |
| age 3-5 years                      | age 6-8 years  | 296              | 2        | a | -0.09 (-0.17 to -0.02) | 295                   | 2        | a | 0.04 (-0.03 to 0.11)  |
| <b>MVPA (hours/day)</b>            |                |                  |          |   |                        |                       |          |   |                       |
| age 3-5 years                      | age 6-8 years  | 296              | 2        | a | 0.18 (-0.02 to 0.39)   | 295                   | 2        | a | -0.09 (-0.30 to 0.11) |

Generalized linear mixed models on accelerometry data in counts per minute (counts/min), time in sedentary activity or moderate to vigorous physical activity (MVPA) recorded by accelerometry between age 3-5 years, and lung function. Age specific analyses: no data available at other age groups (0-2, 6-8, 9-14, 15-18 years). Subgroup analysis with exclusion of participants with wheeze or asthma at baseline.

FEV<sub>1</sub> forced expiratory volume in 1 second (in z-score); FVC: forced vital capacity; B Beta; 95% CI 95% confidence interval.

# Beta (B) indicates the increase of FEV<sub>1</sub> z-score in SDS at age at outcome for each hour per day of measured time in sedentary activity or moderate to vigorous physical activity (MVPA) recorded by accelerometry at age at exposure.

Multivariable analyses adjusted for sex, maternal education level, maternal BMI.

Included cohorts:

a: KOALA, SWS
